# Supplementary material for: Design, synthesis and biological evaluation ofN-arylsulfonyl carbazoles as novel anticancer agents
Source: Royal Society of Chemistry journal article supplement (doi:10.1039/c8ra02939c), 2018-01-01

## Supplementary information

### Design, synthesis and biological evaluation of *N*-arylsulfonyl carbazoles as novel anticancer agents

Xin You<sup>a†</sup>, Daqian Zhu<sup>a, b†</sup>, Wenhua Lu<sup>a</sup>, Yichen Sun<sup>a</sup>, Shuang Qiao<sup>a, b</sup>, Bingling Luo<sup>a, b</sup>,  
Yongliang Du<sup>a, b</sup>, Rongbiao Pi<sup>b</sup>, Yumin Hu<sup>a</sup>, Peng Huang<sup>a\*</sup>, Shijun Wen<sup>a, b\*</sup>

<sup>a</sup> Sun Yat-sen University Cancer Center, State Key Laboratory of Oncology in South  
China, Collaborative Innovation Center for Cancer Medicine, Sun Yat-sen University,  
651 Dongfeng East Road, Guangzhou 510060, China

<sup>b</sup> School of Pharmaceutical Sciences, Sun Yat-sen University, 132 Waihuan East  
Road, Guangzhou 510006, China

<sup>†</sup> Both authors contributed equally to this work

**Table of contents:**

I.  $^1\text{H}$  NMR and  $^{13}\text{C}$  NMR spectra.....S1

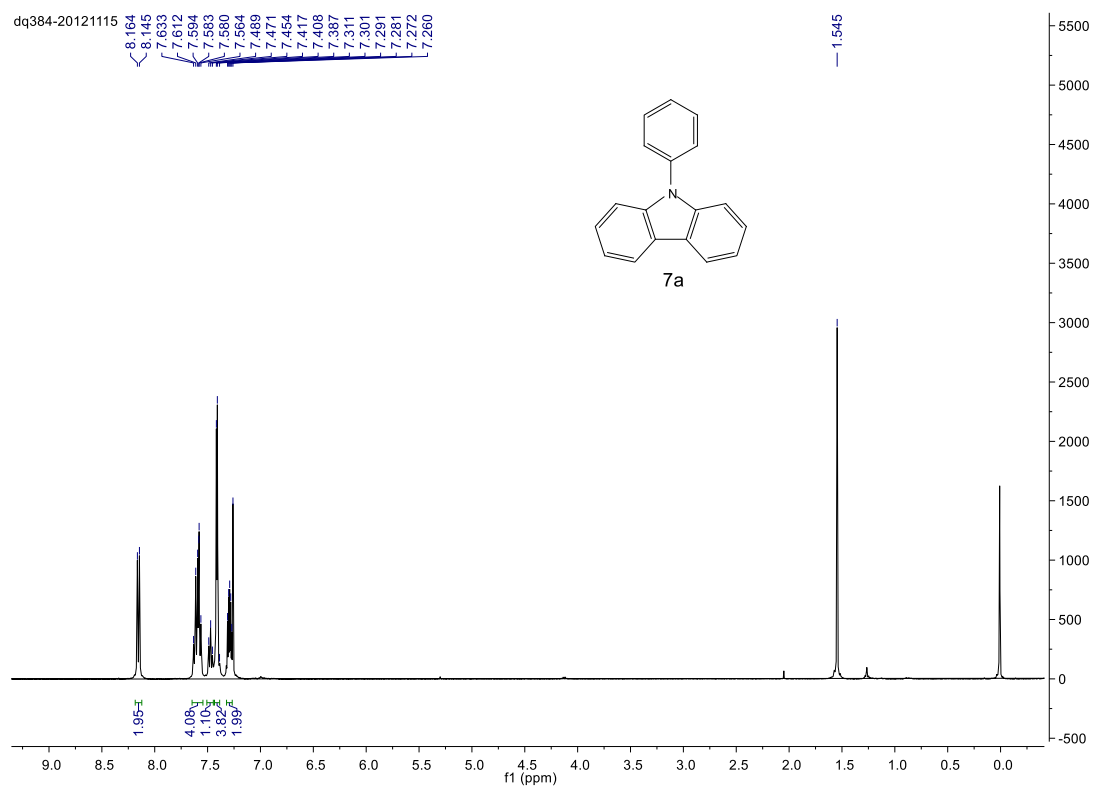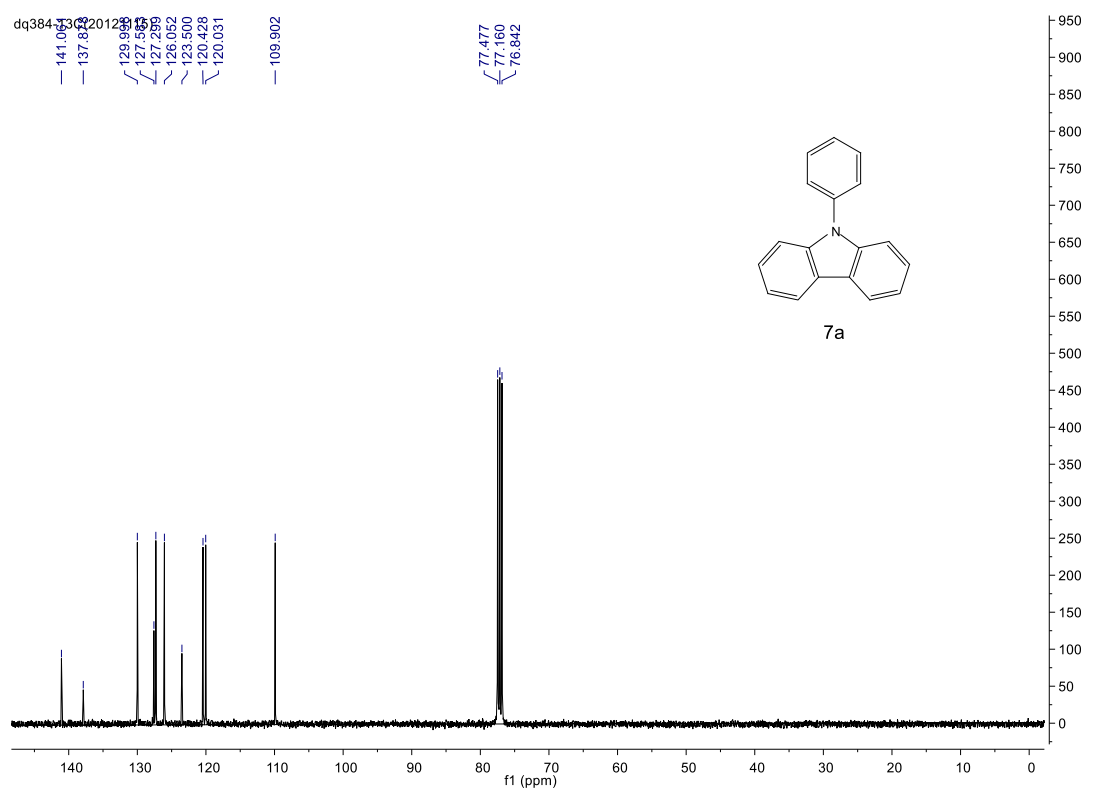

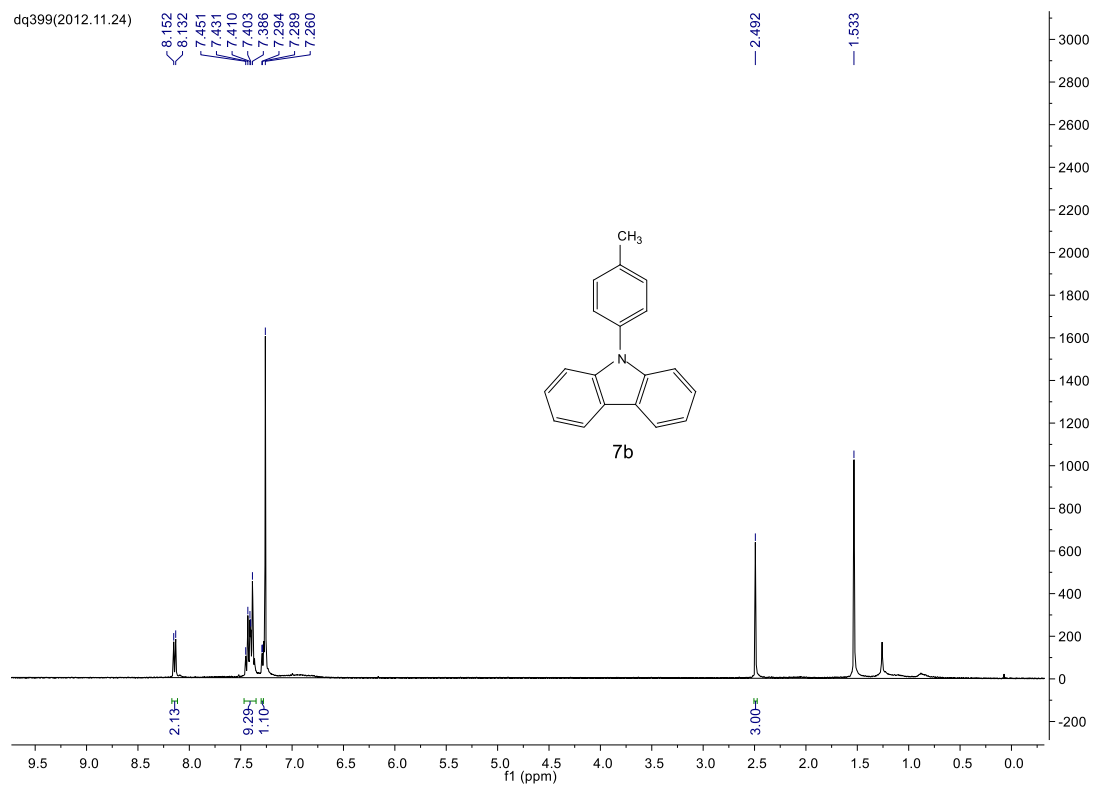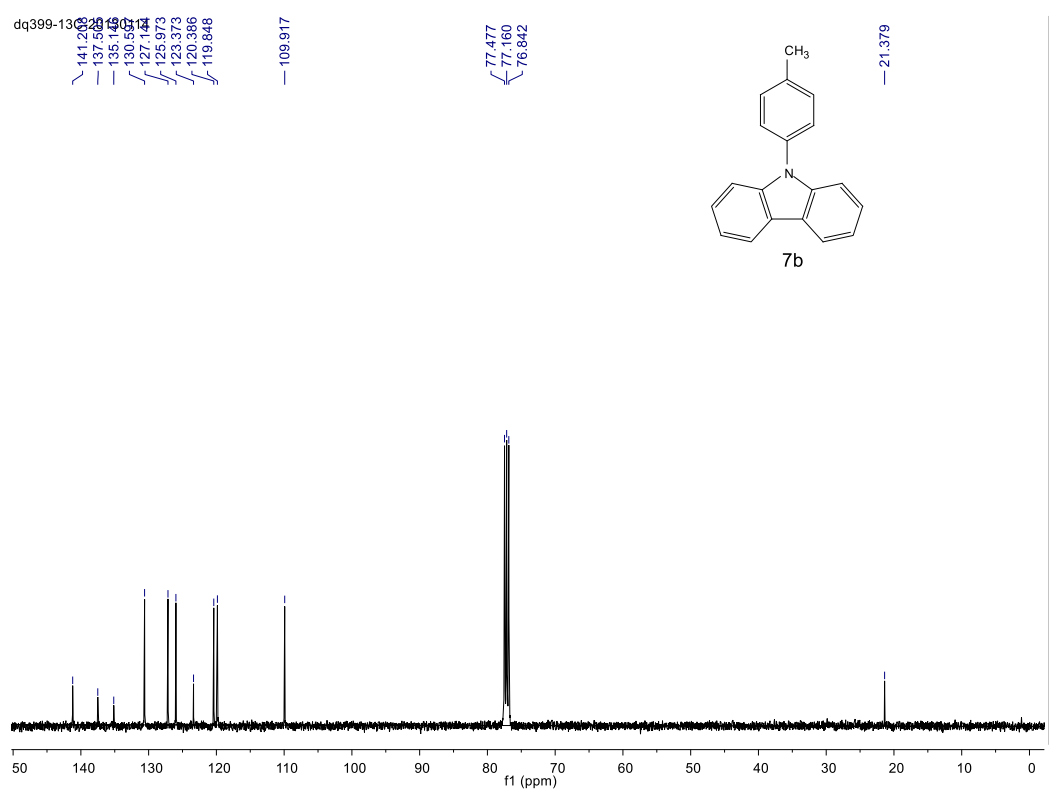

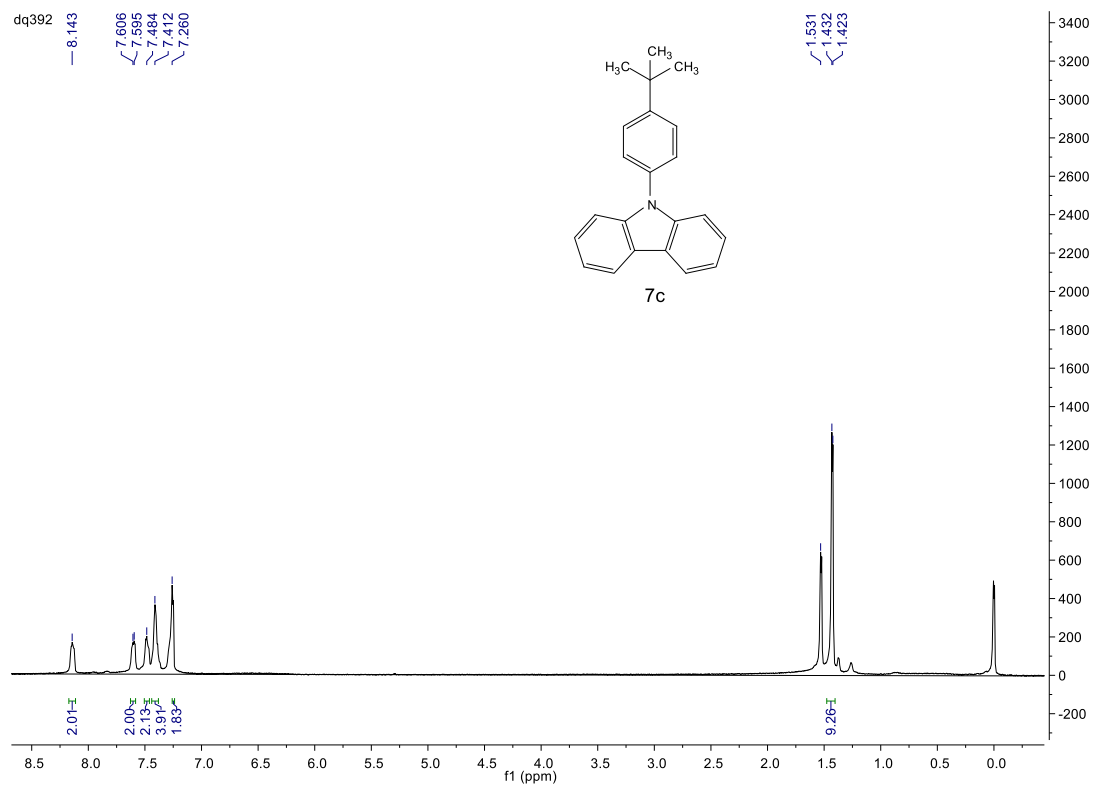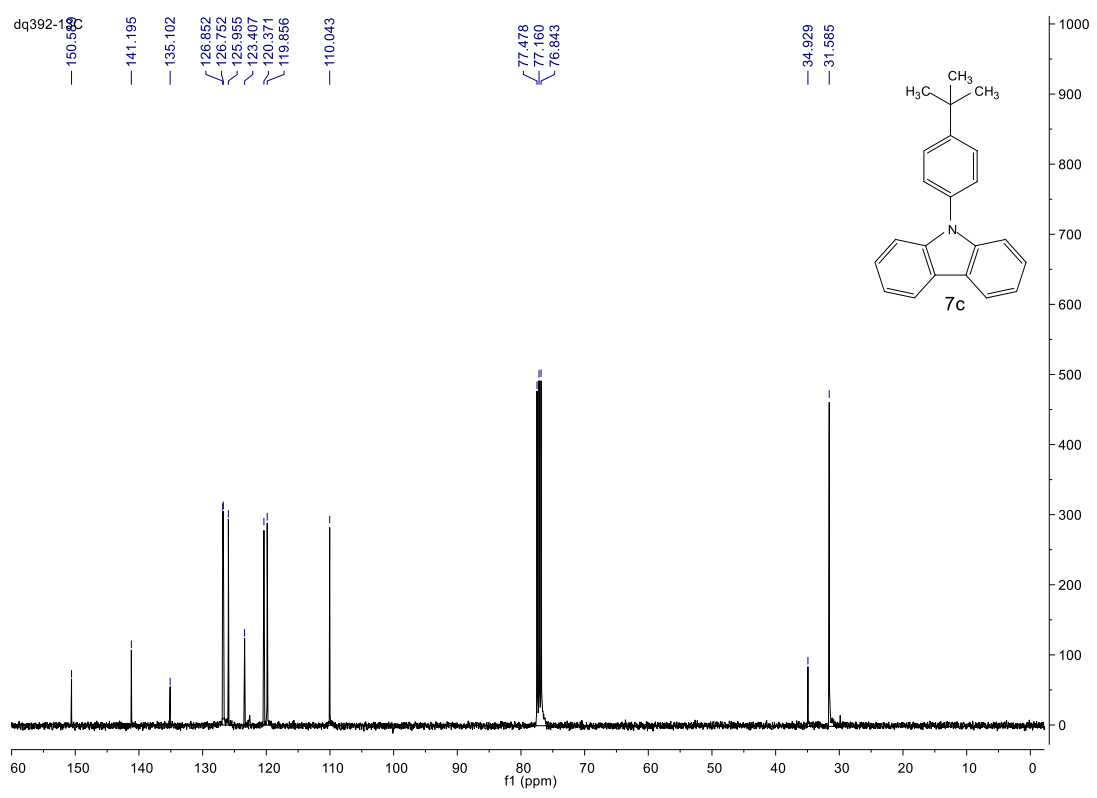

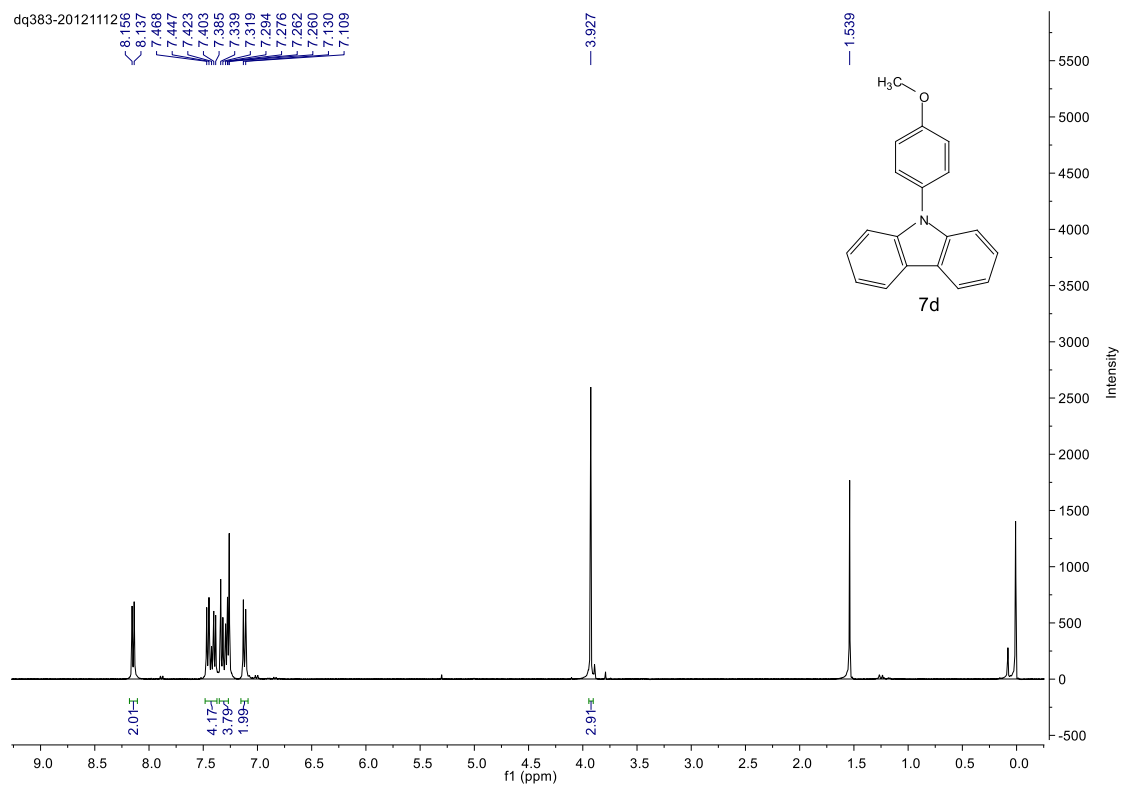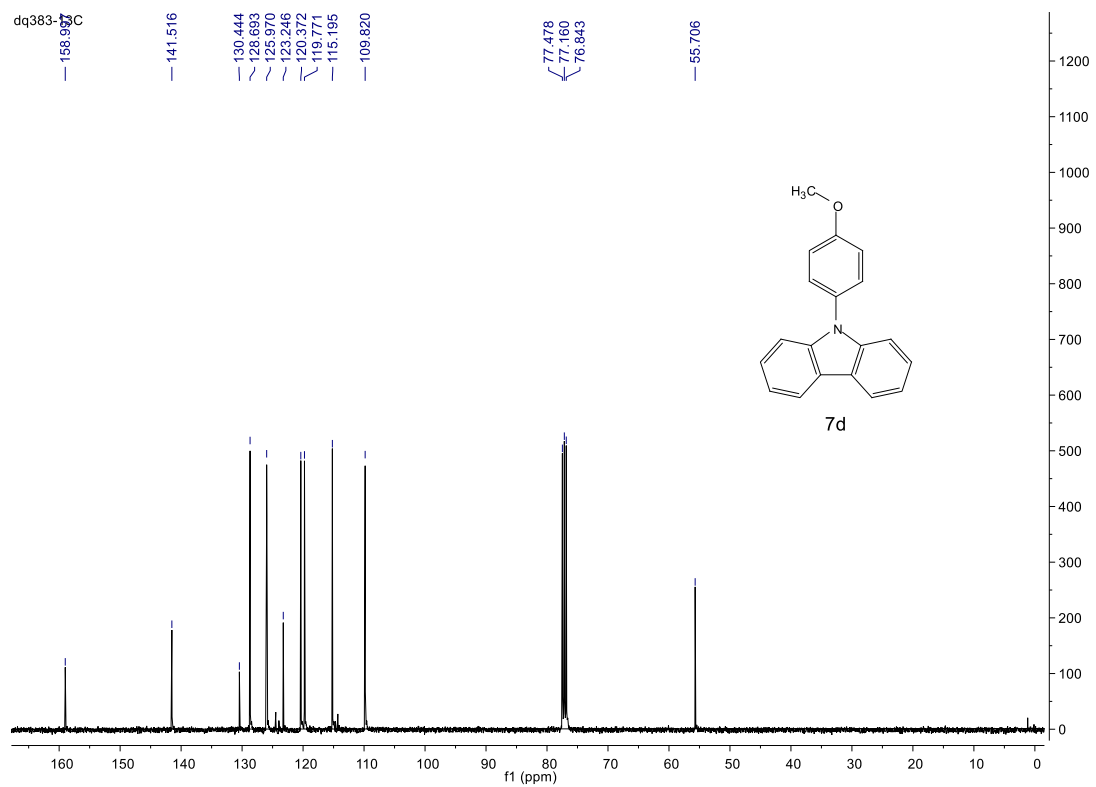

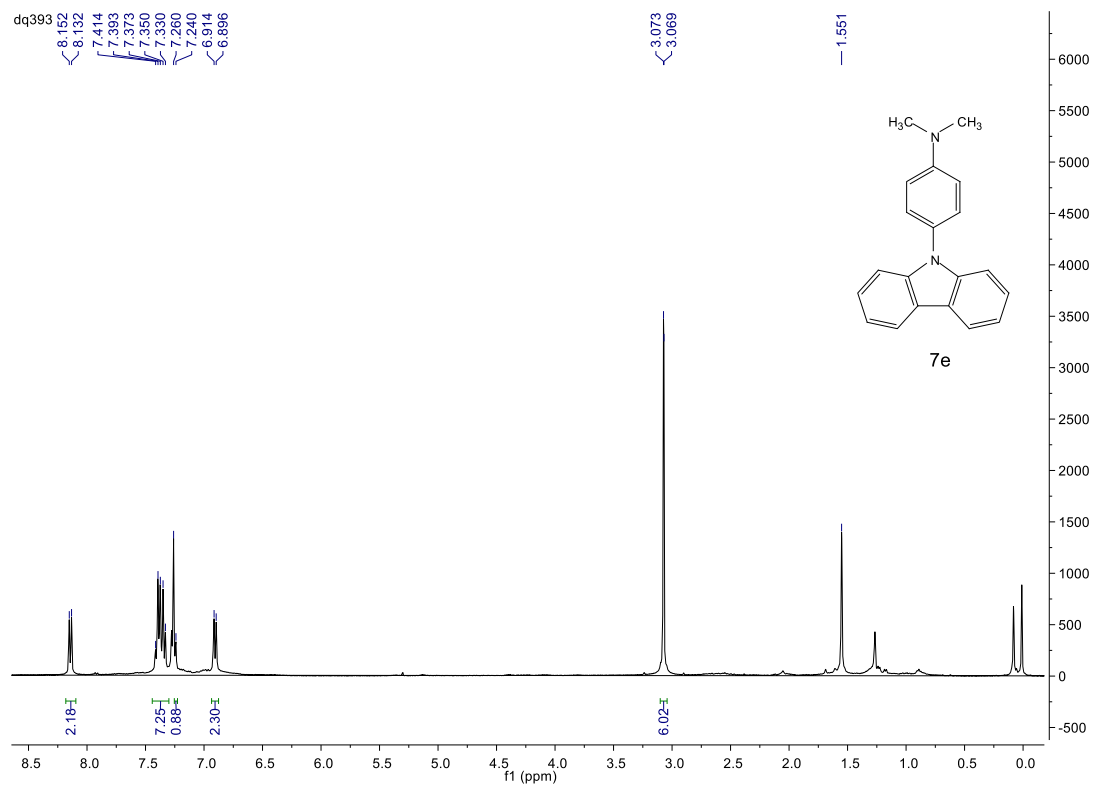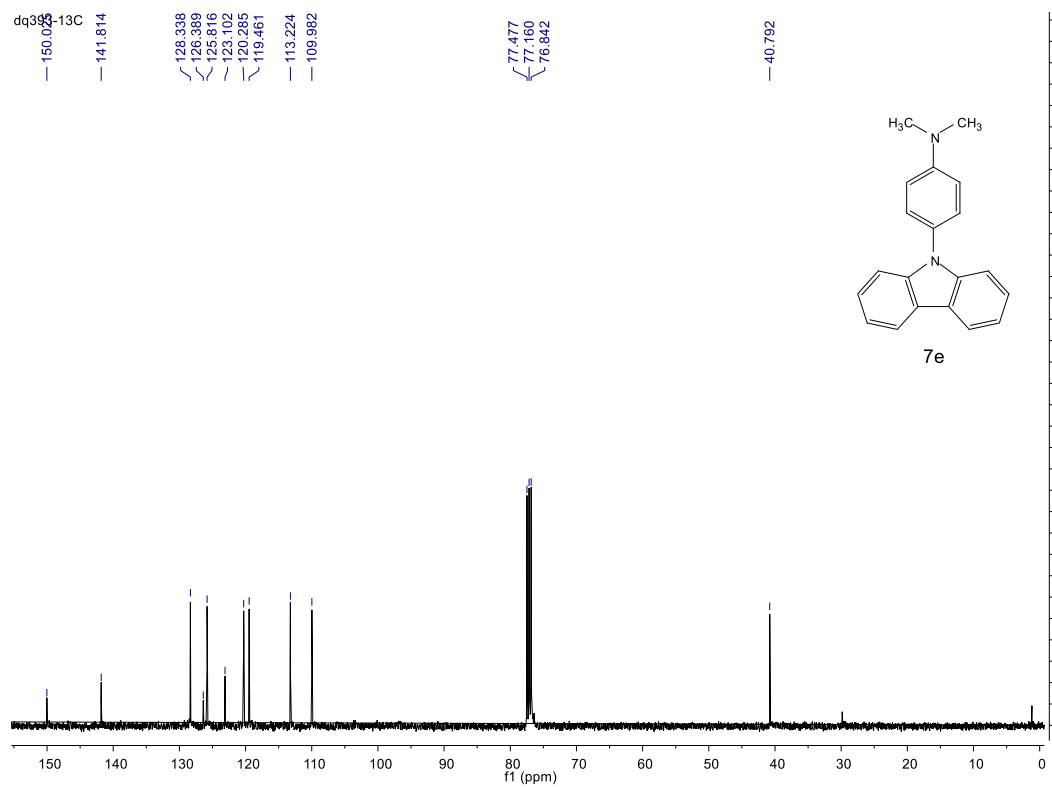

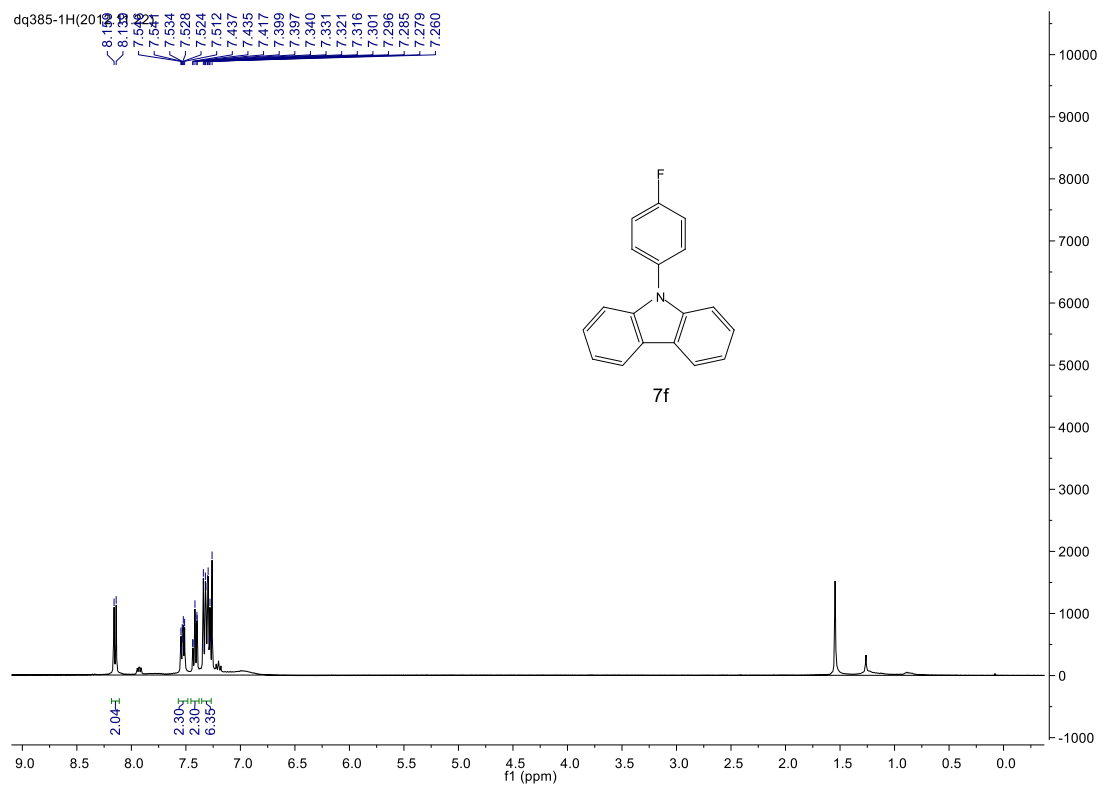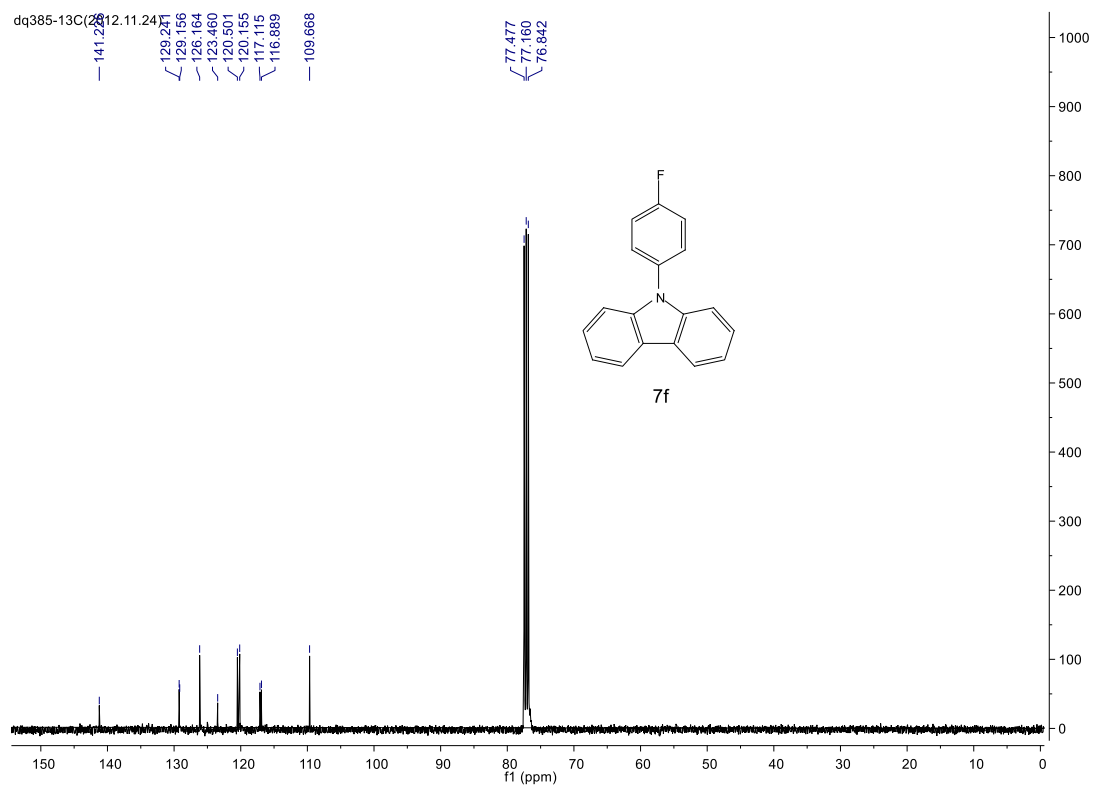



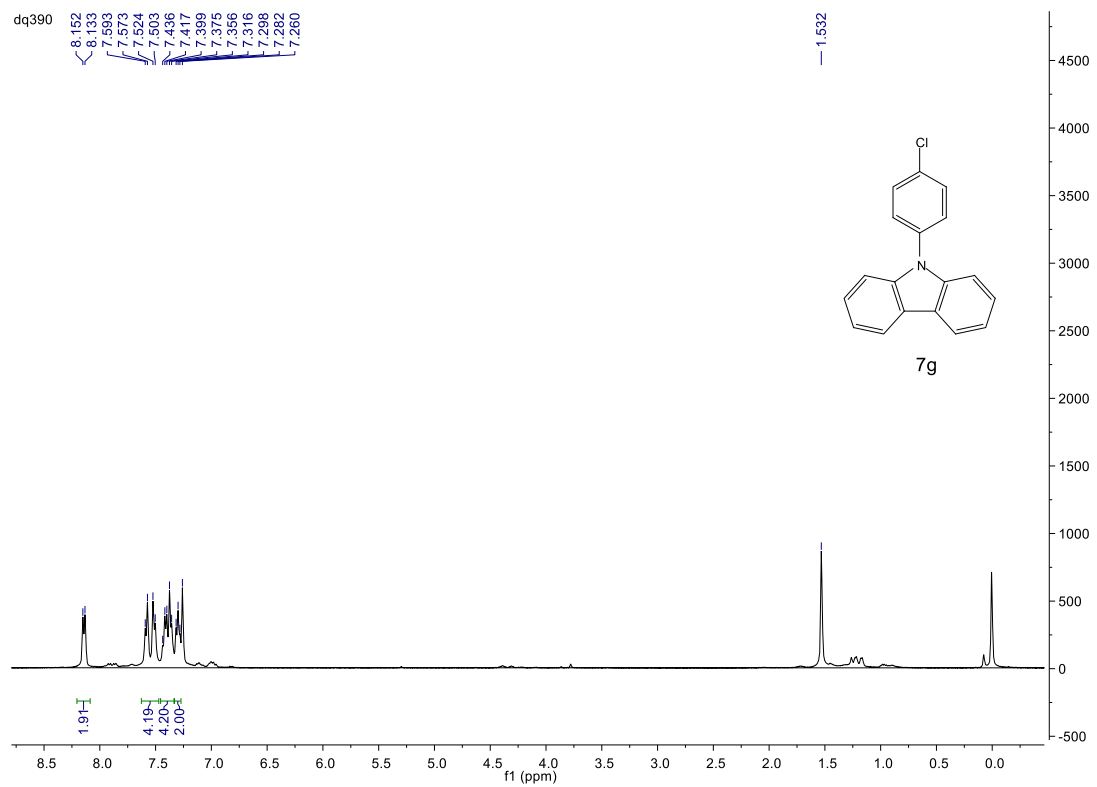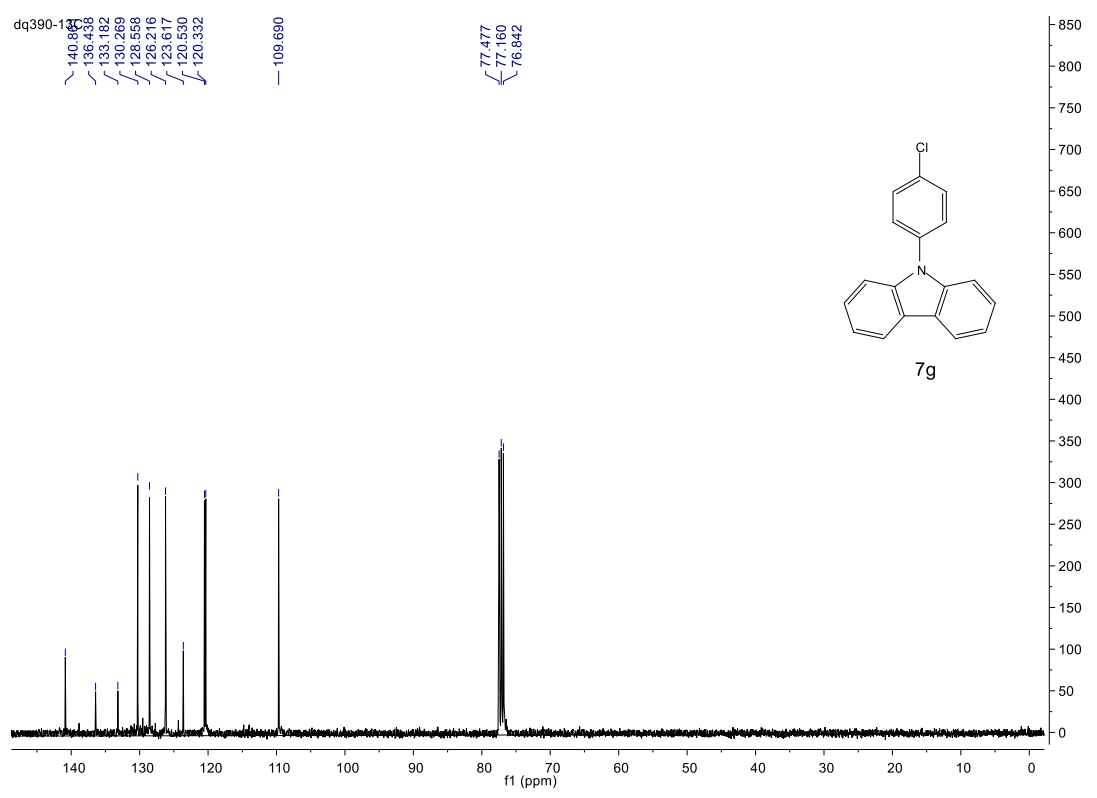

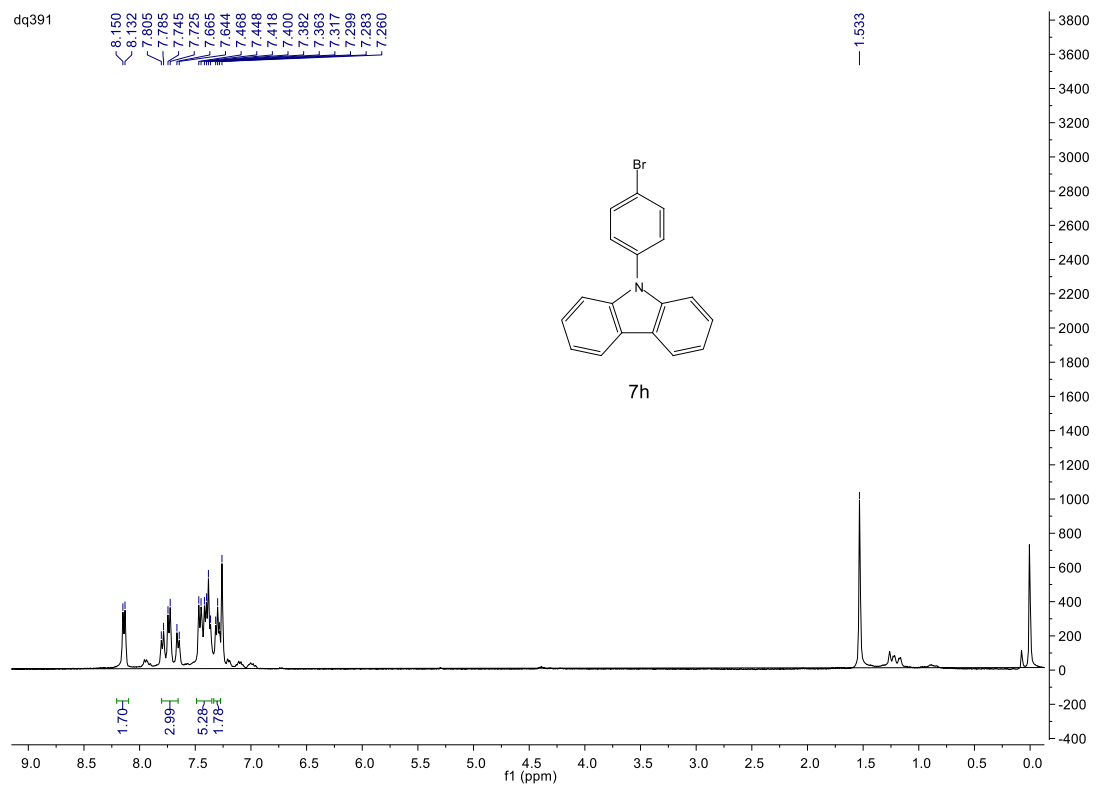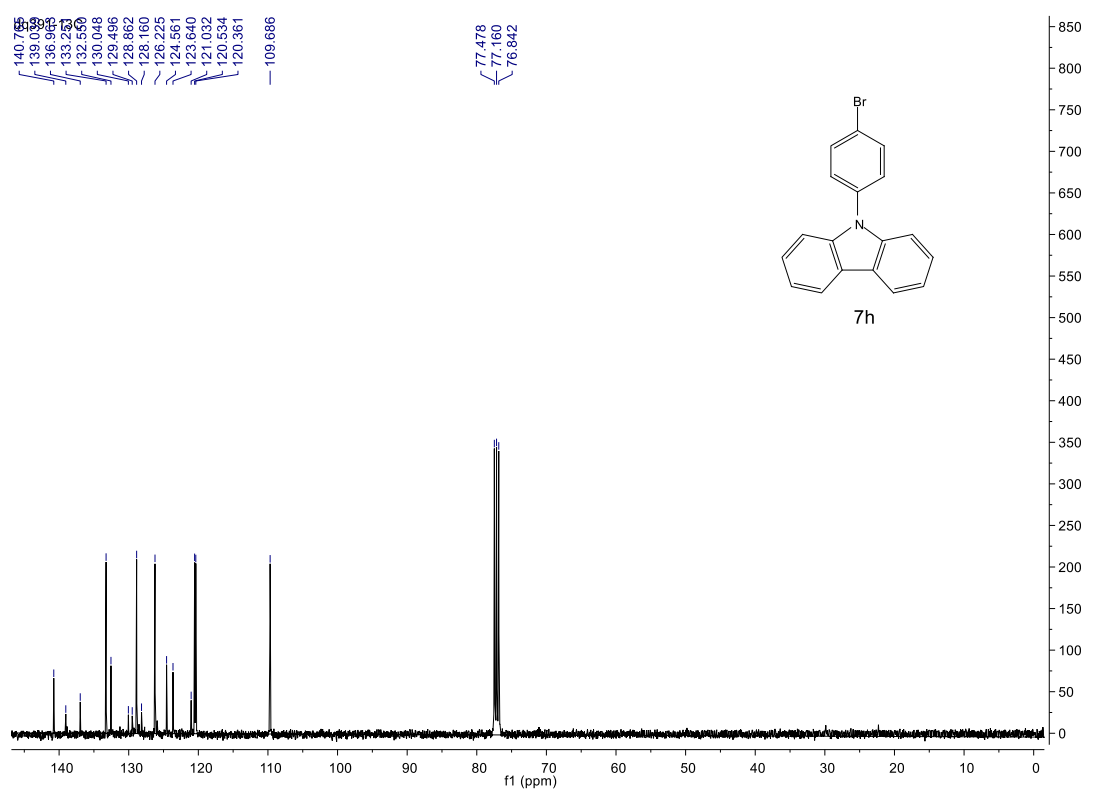

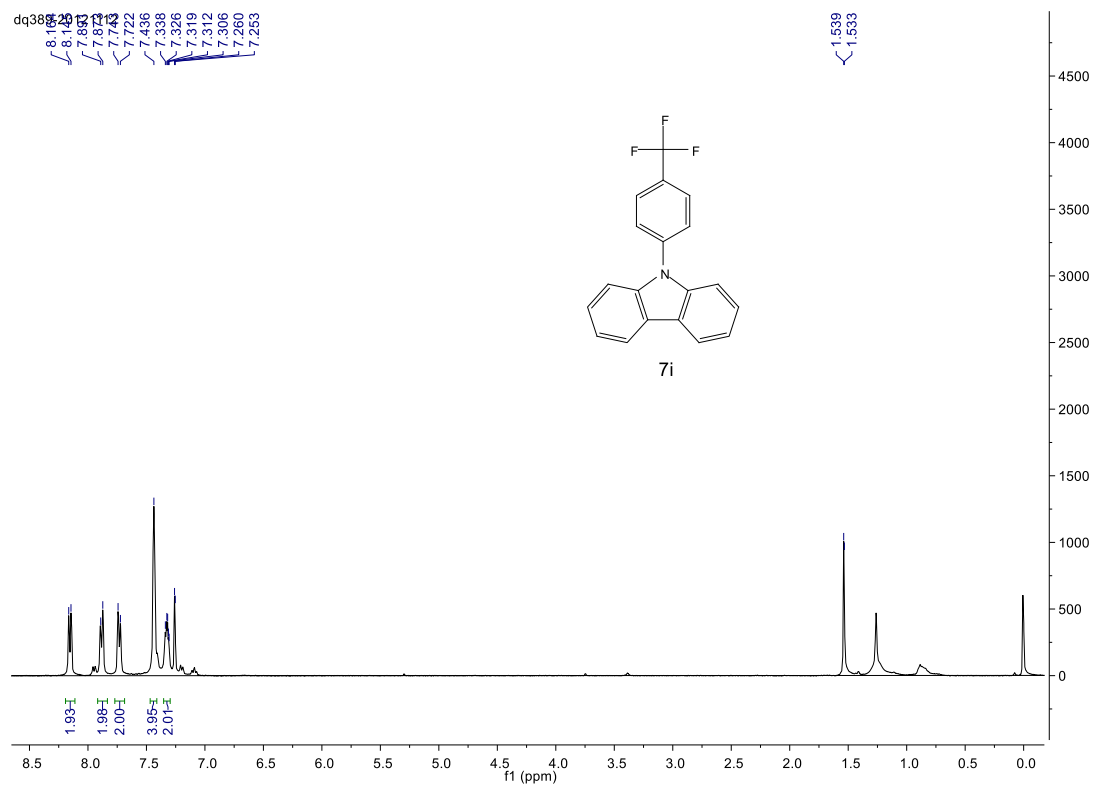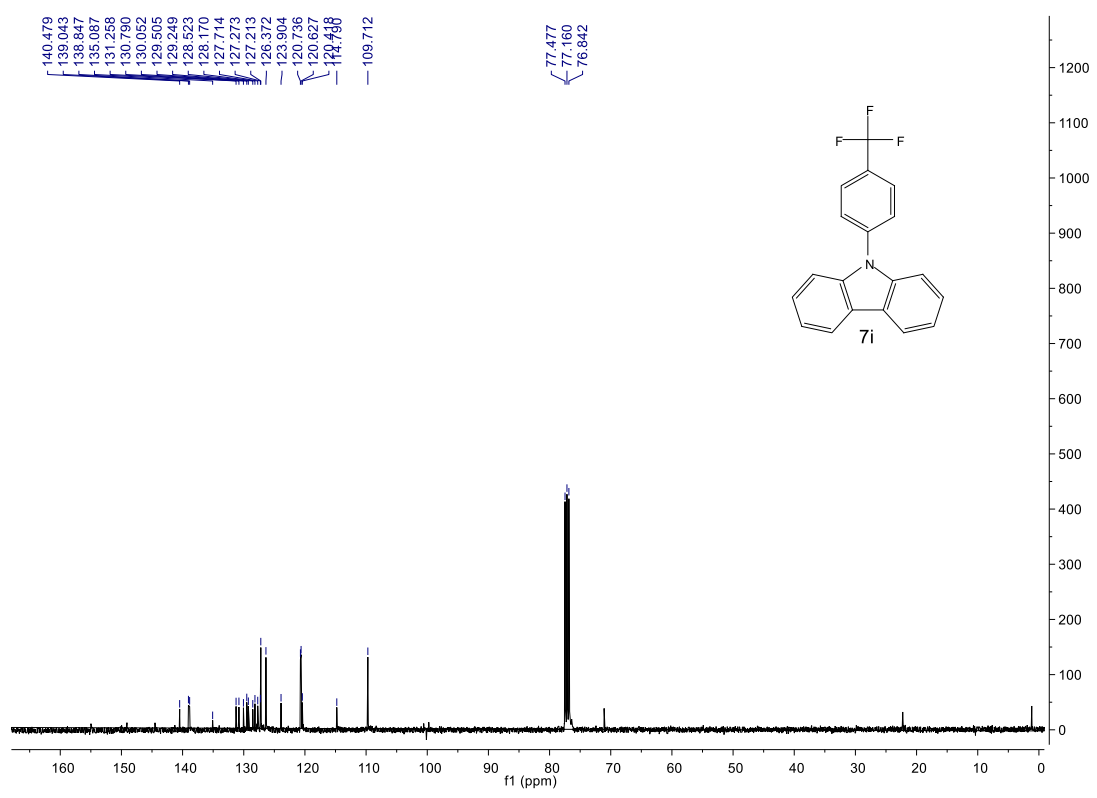

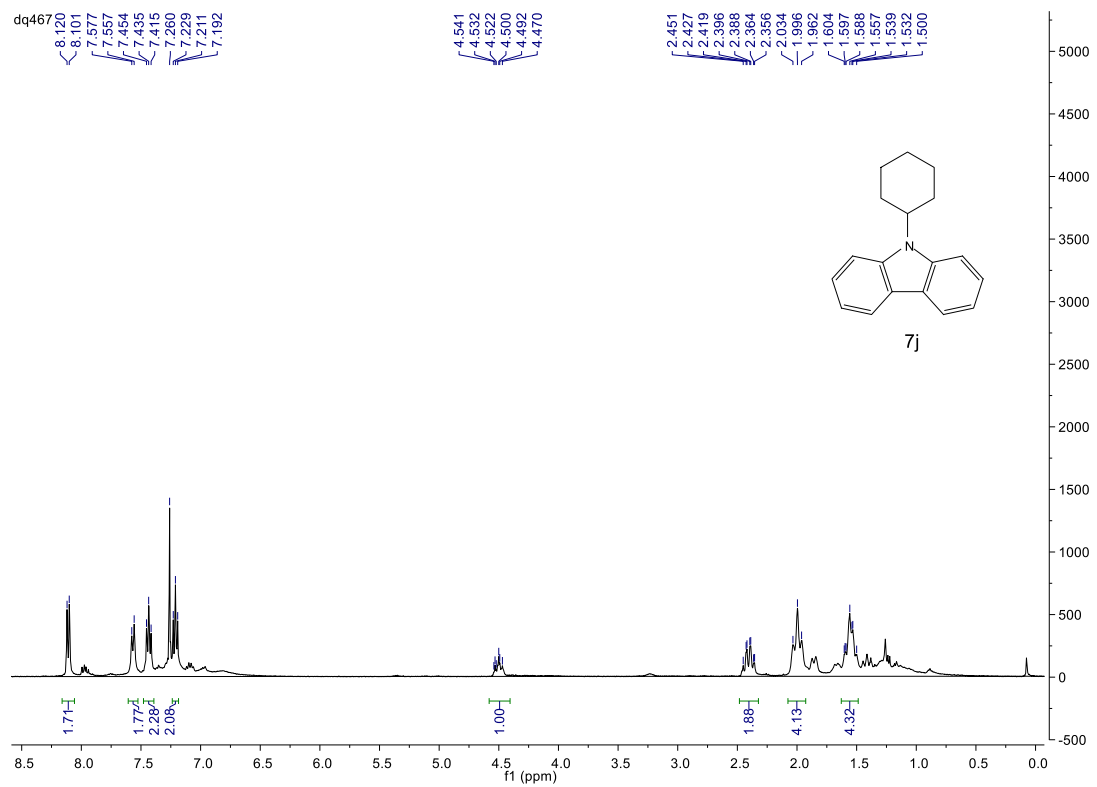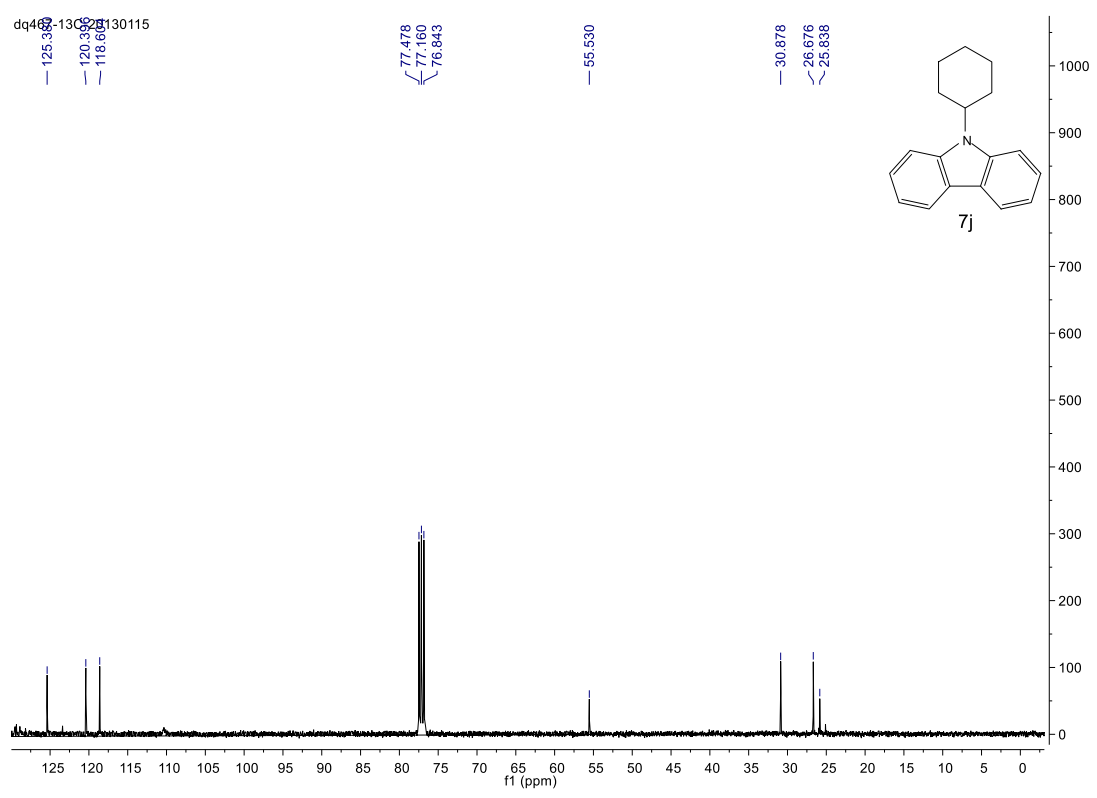

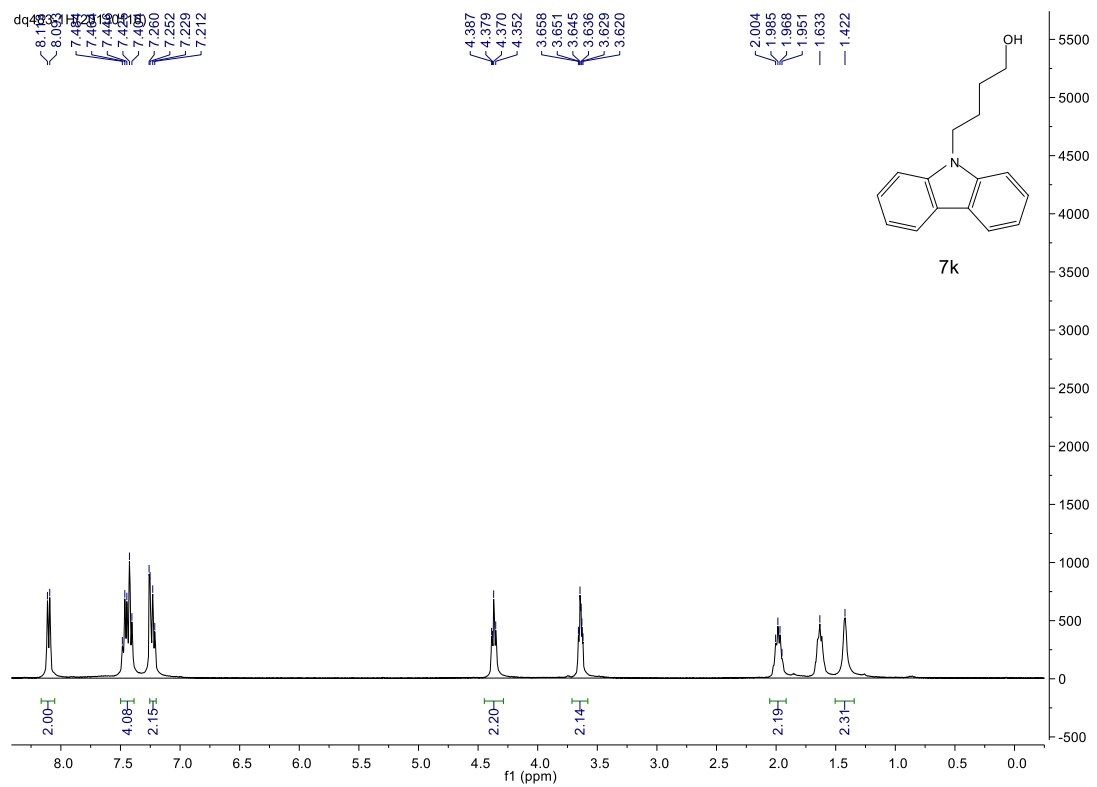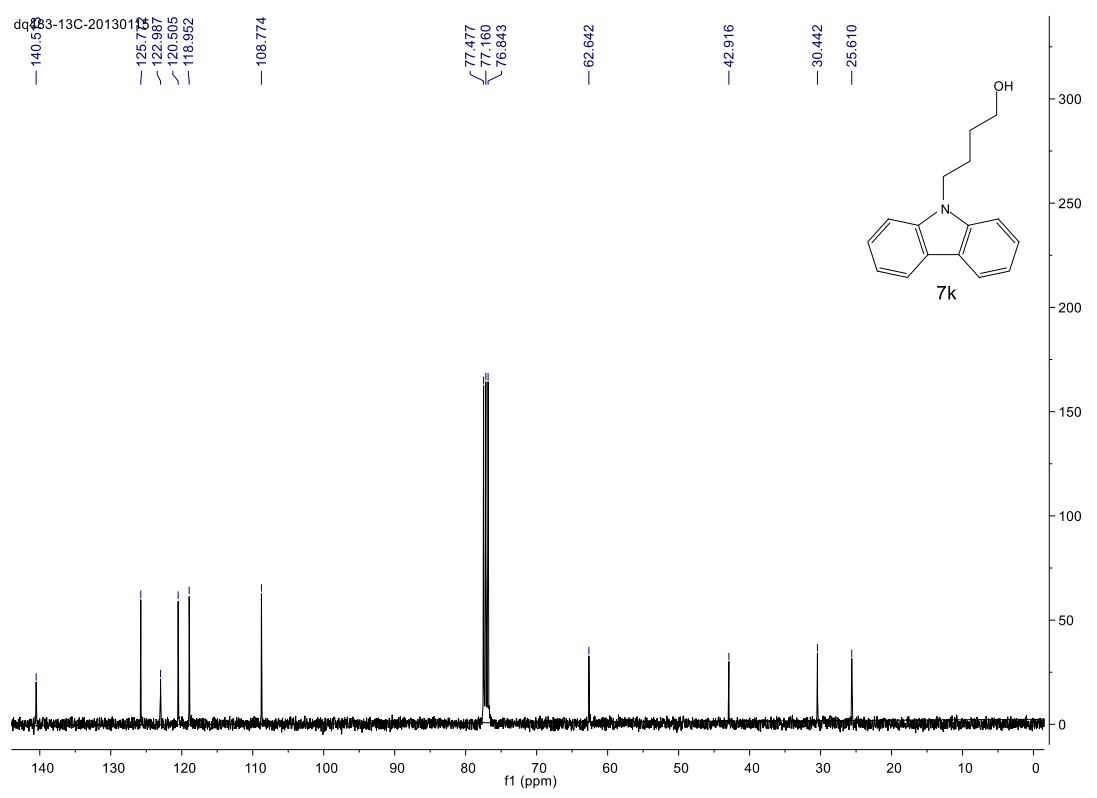

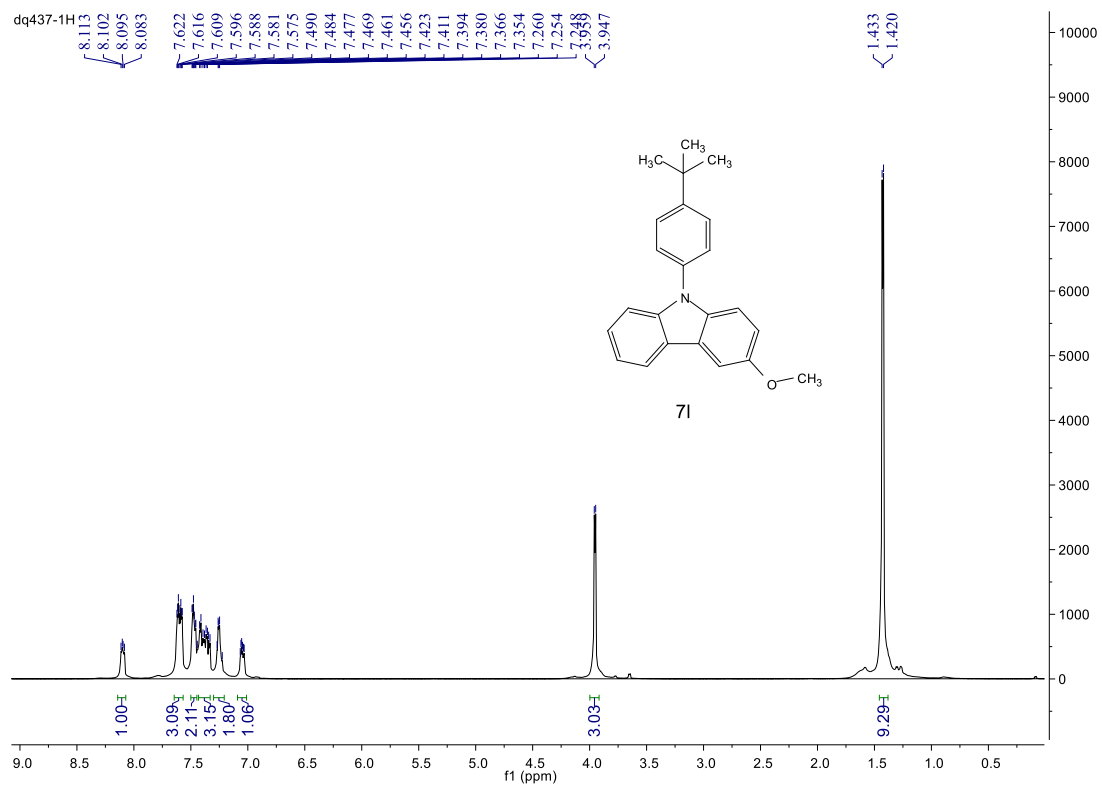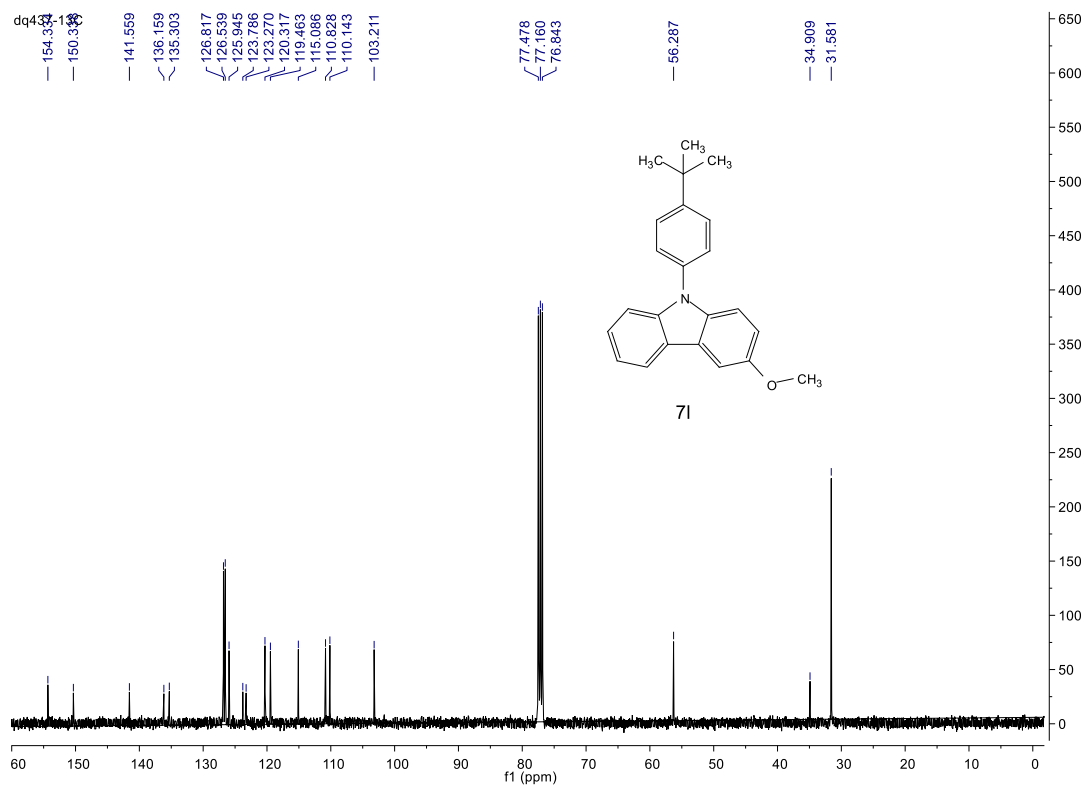

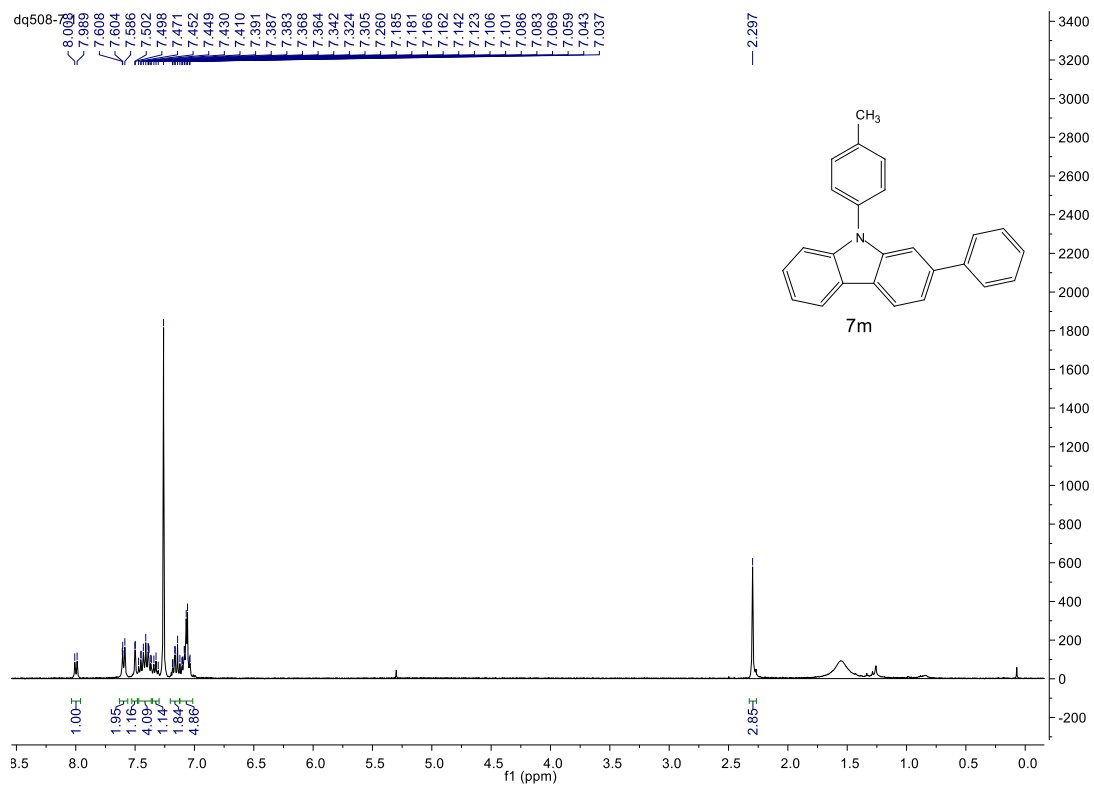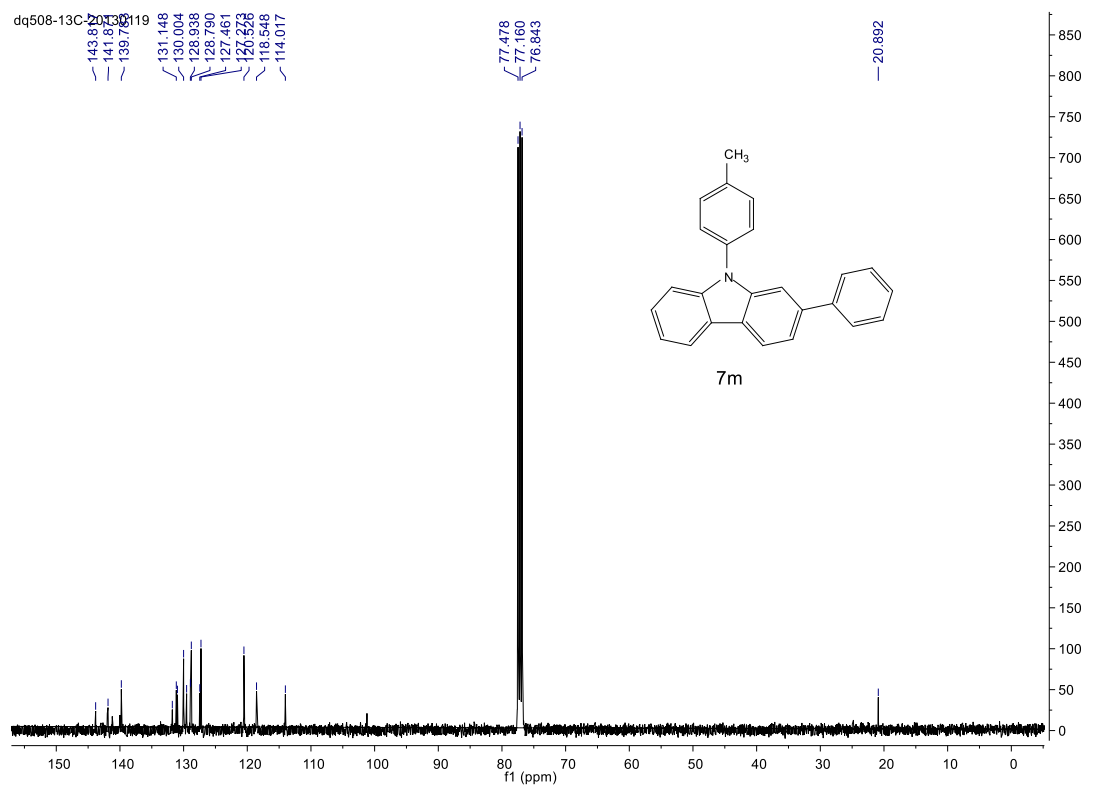

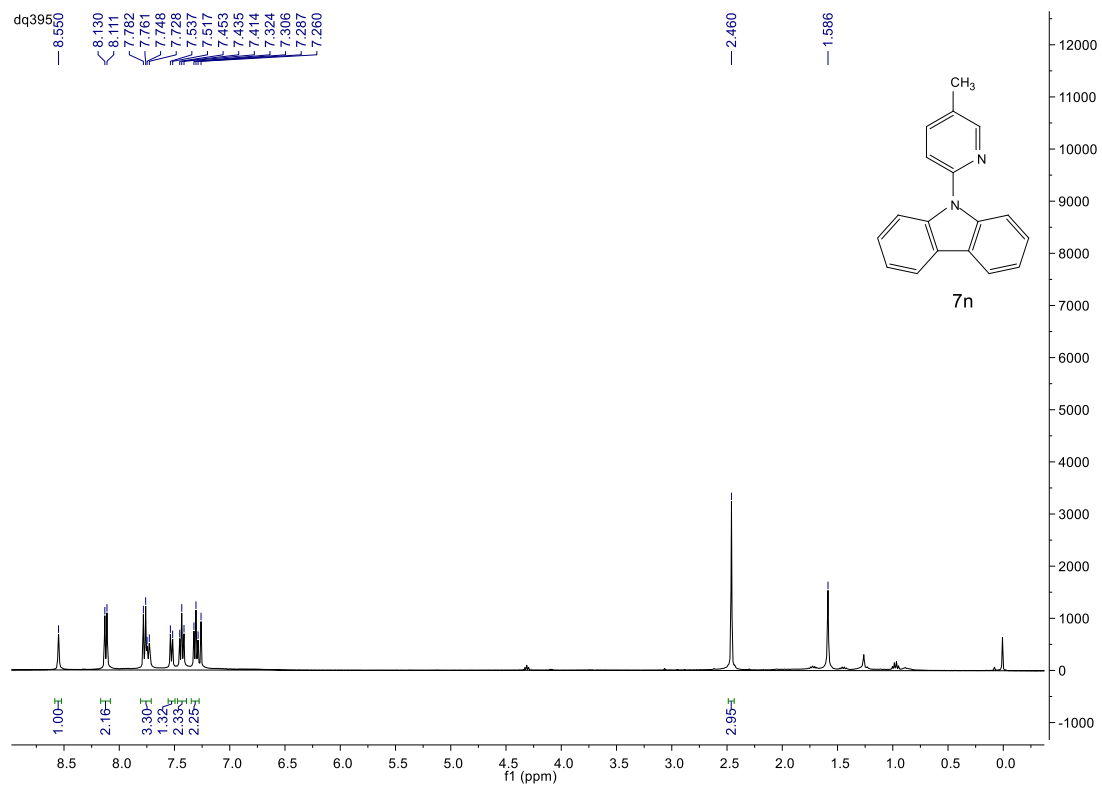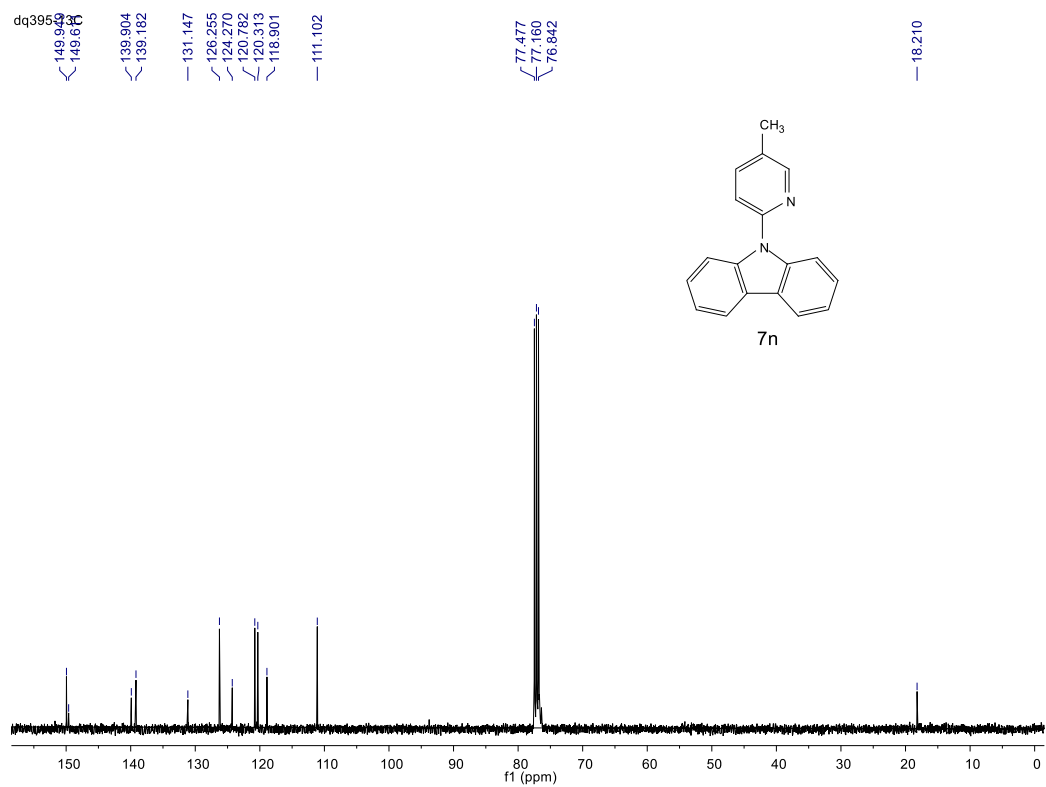



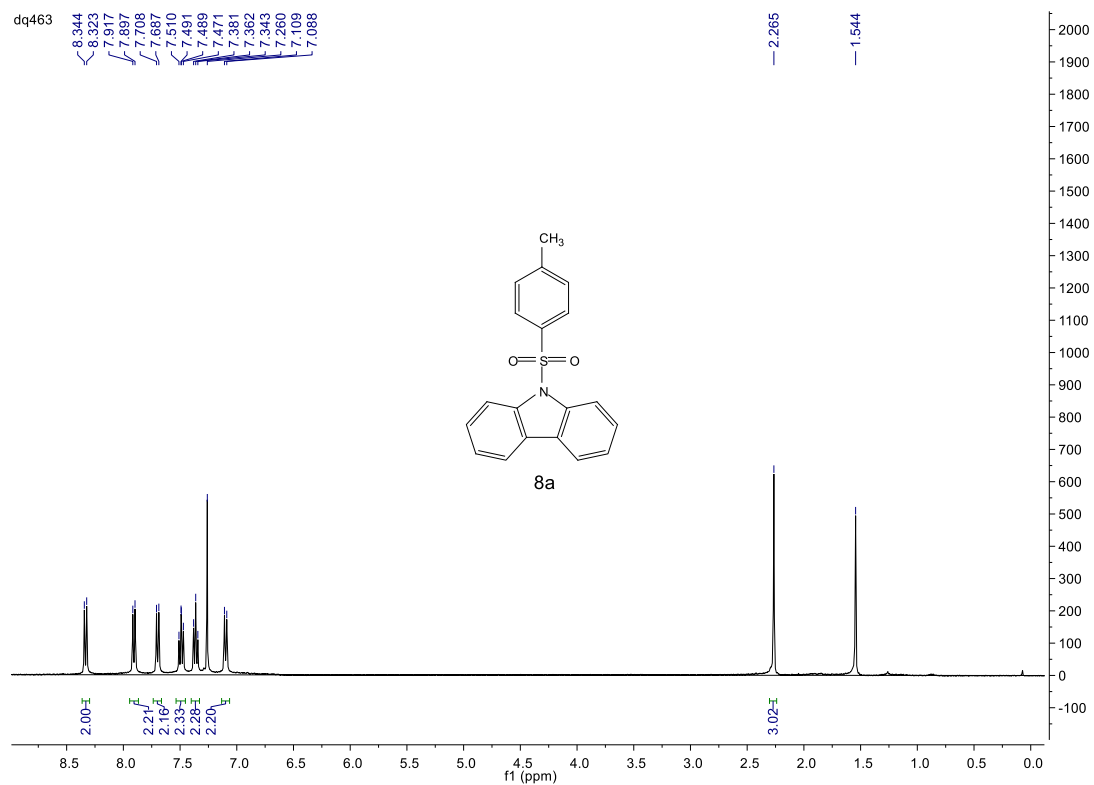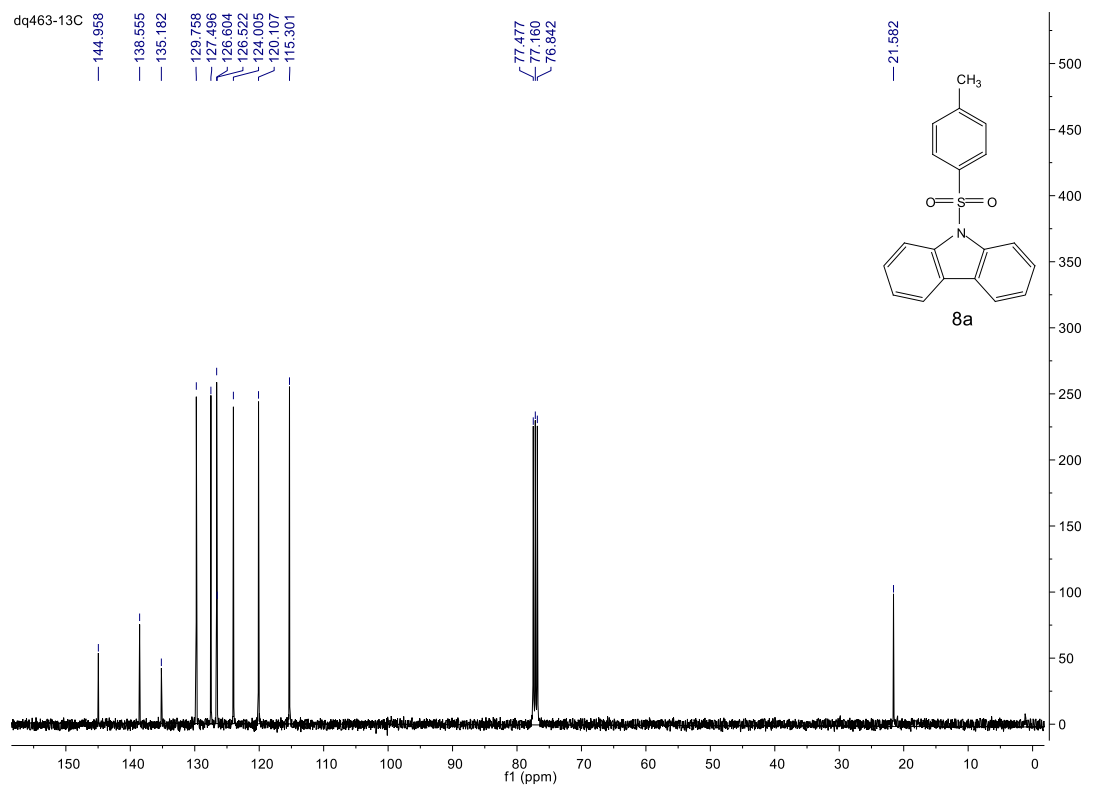

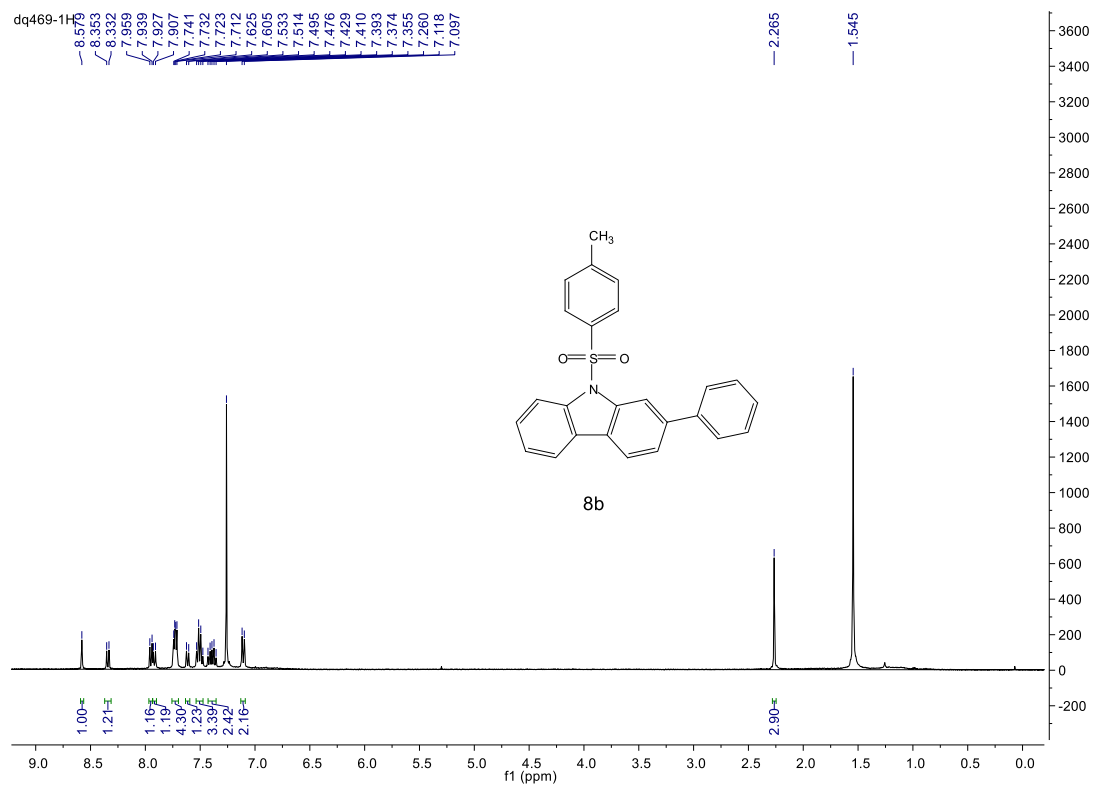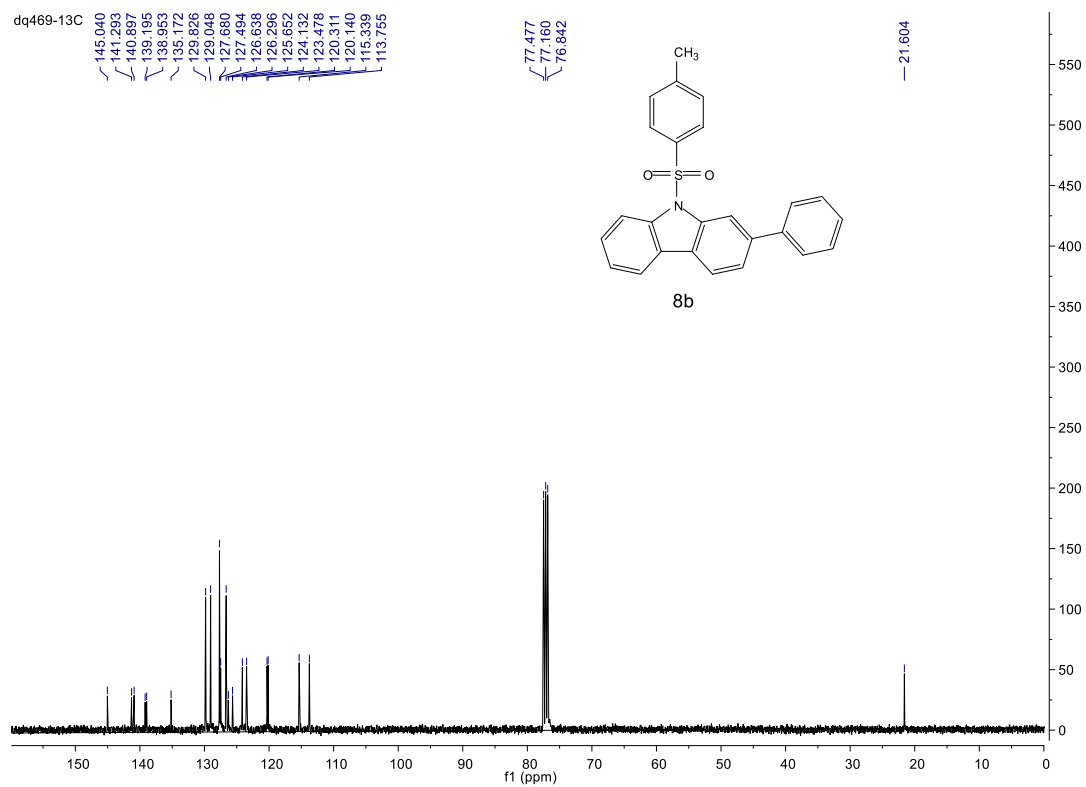

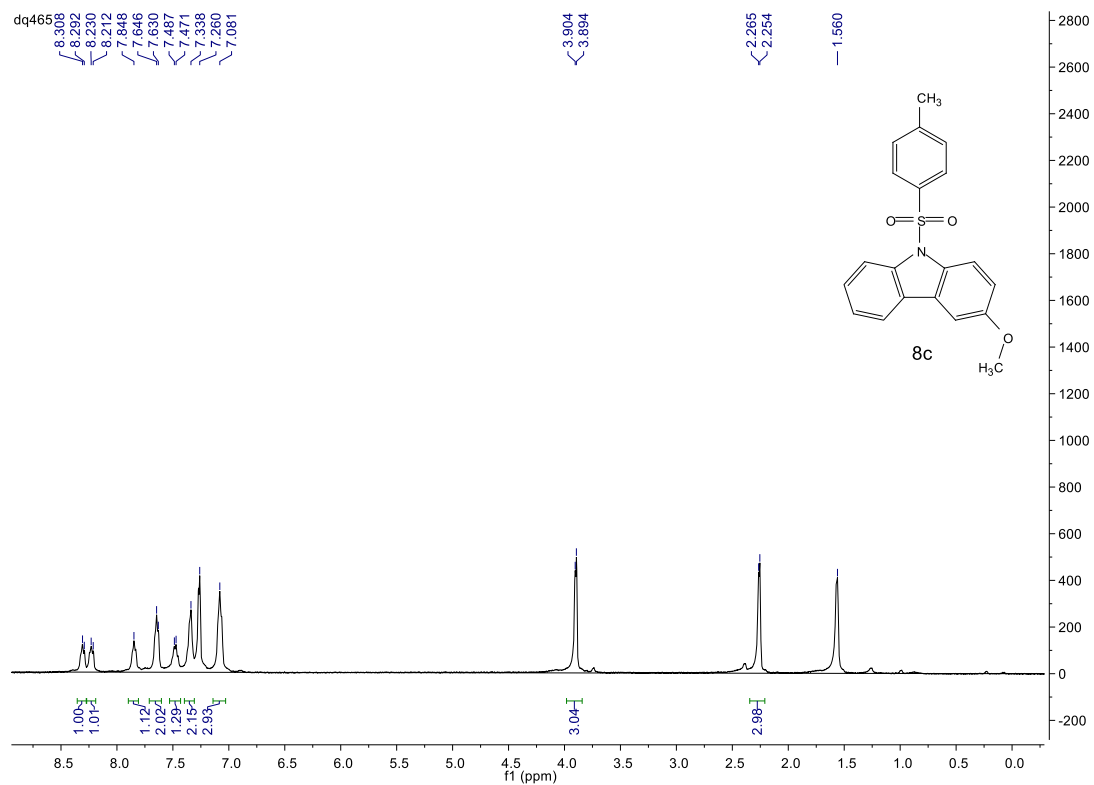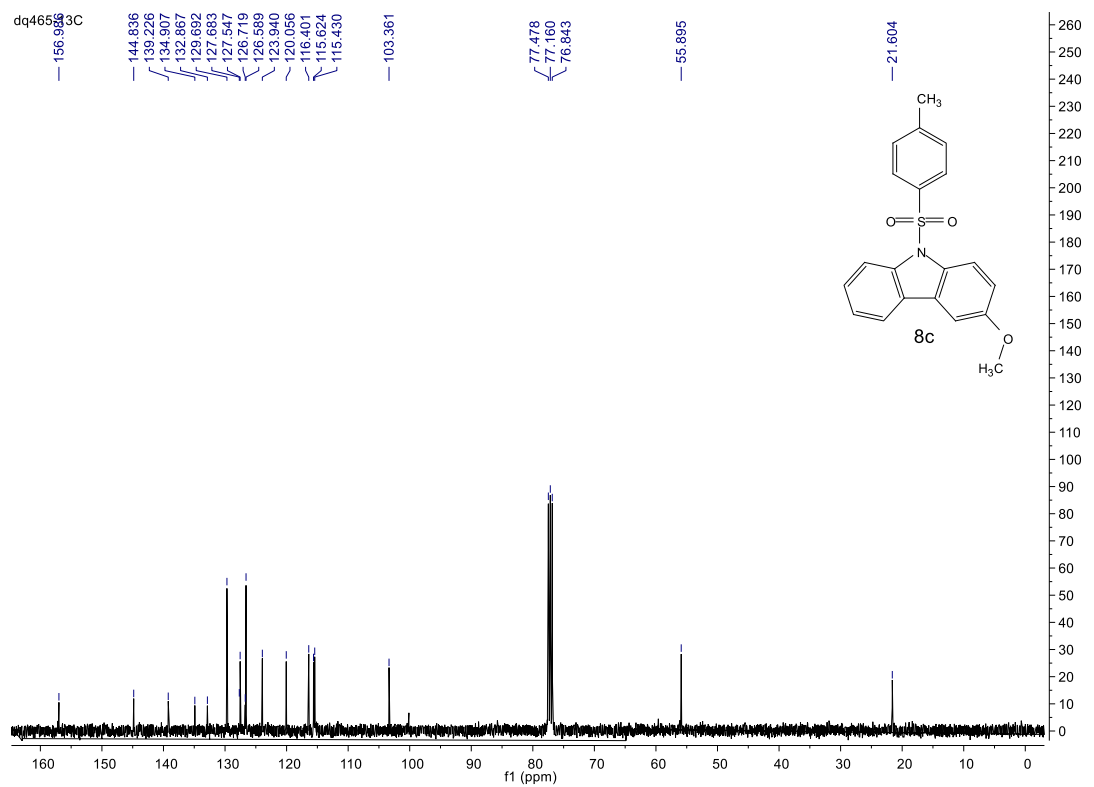

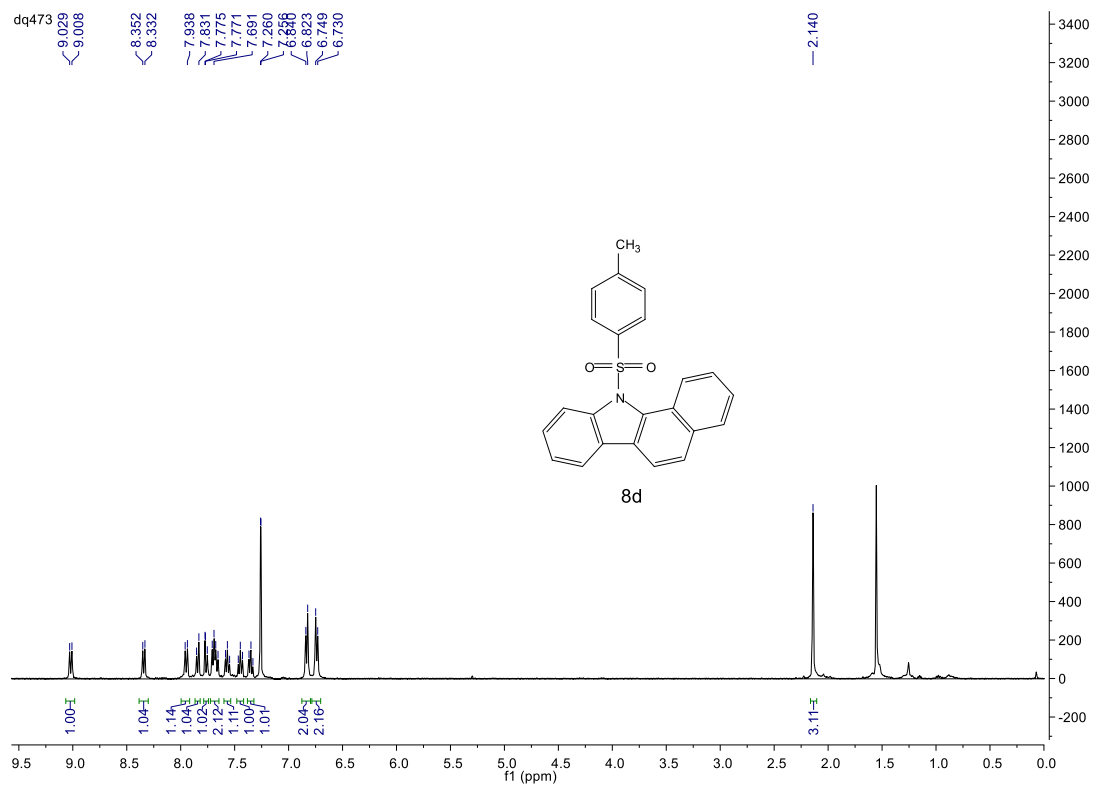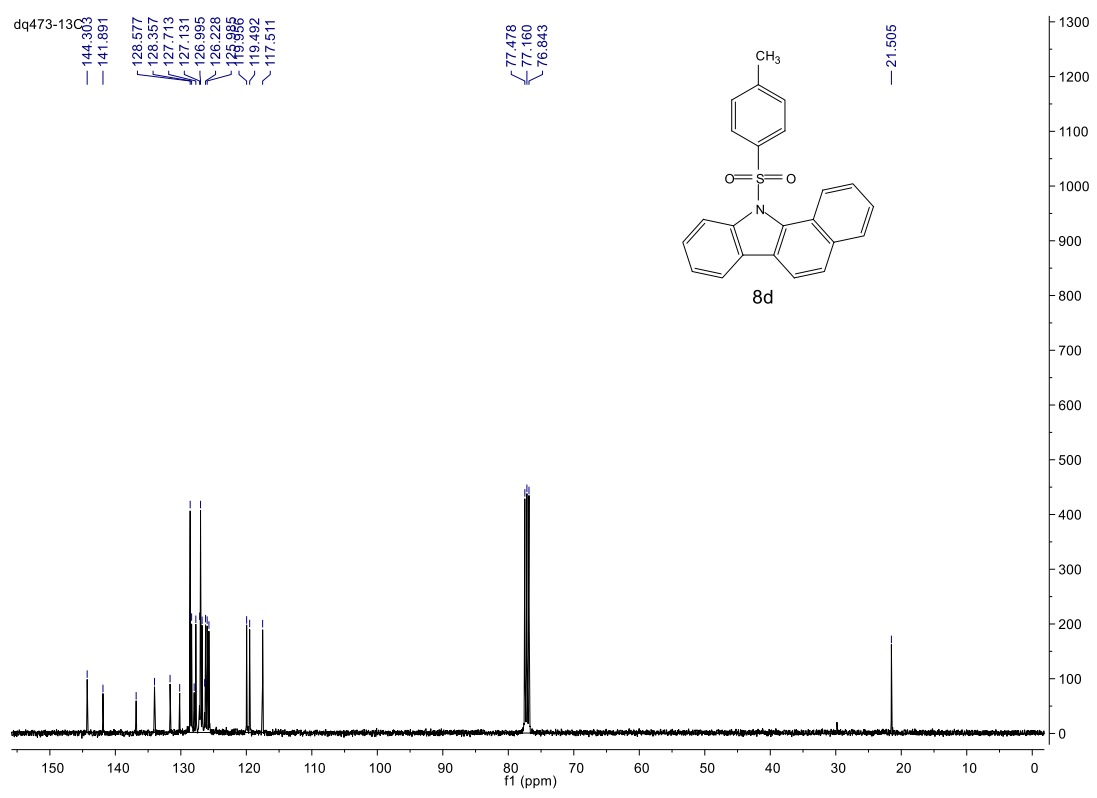

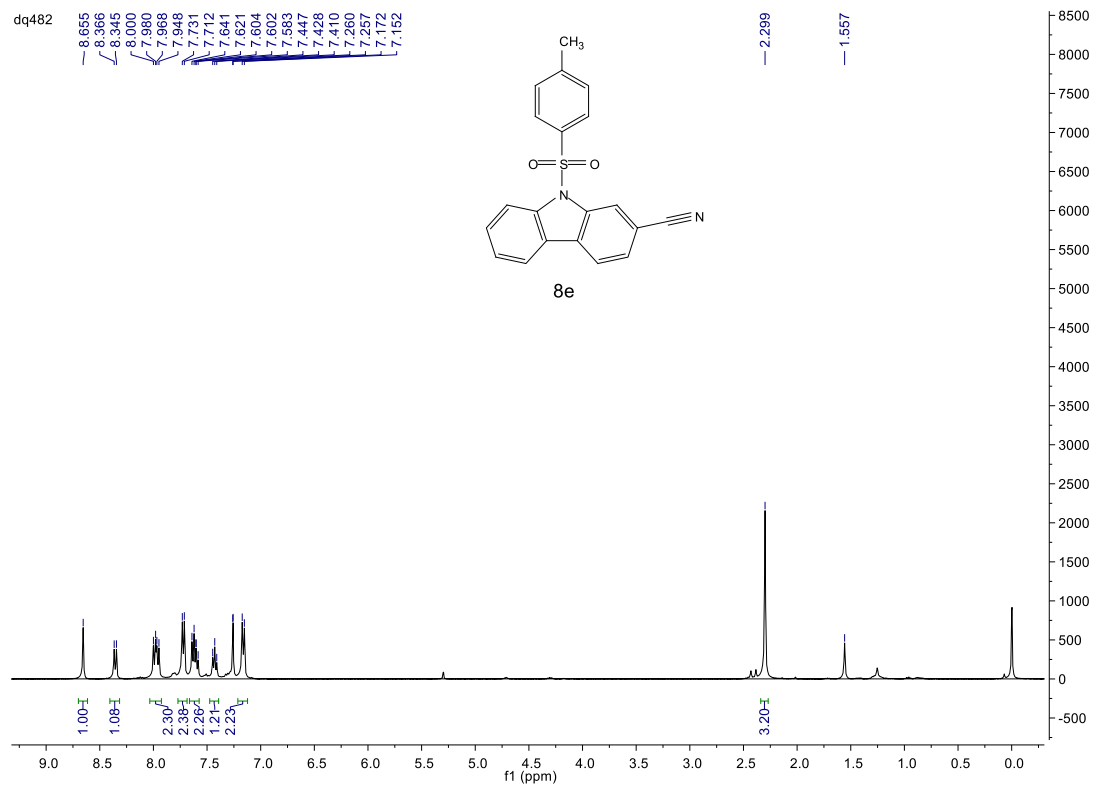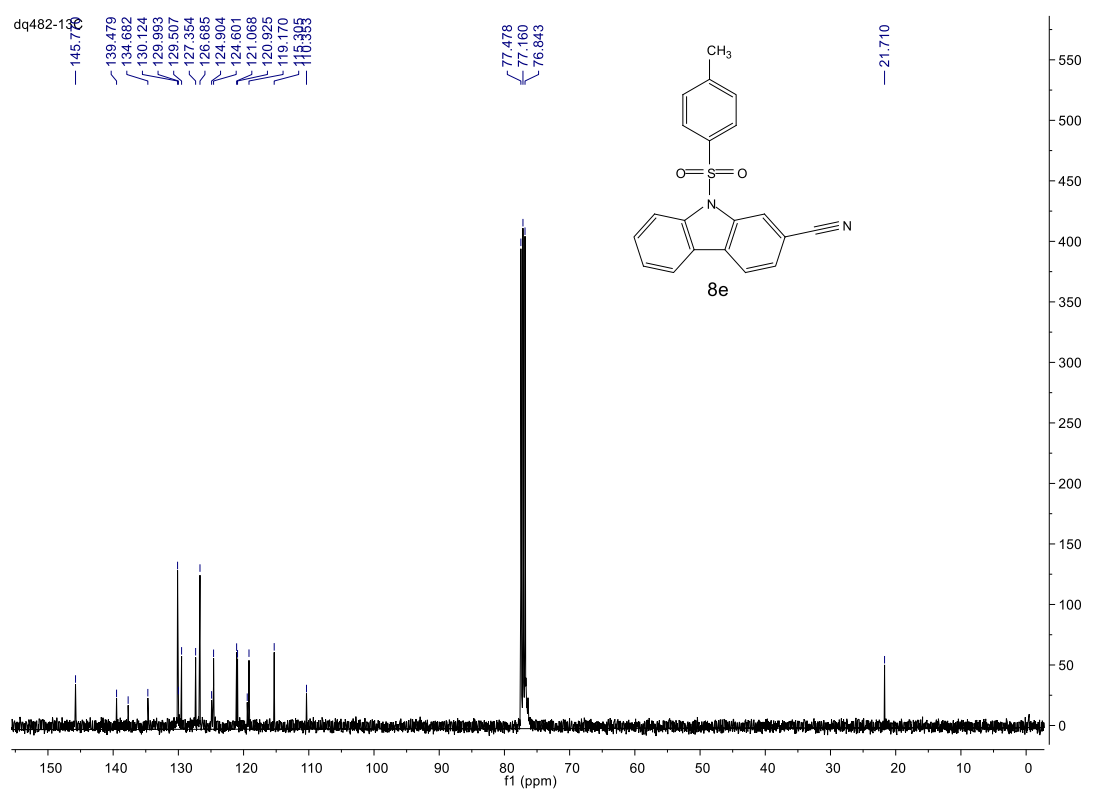

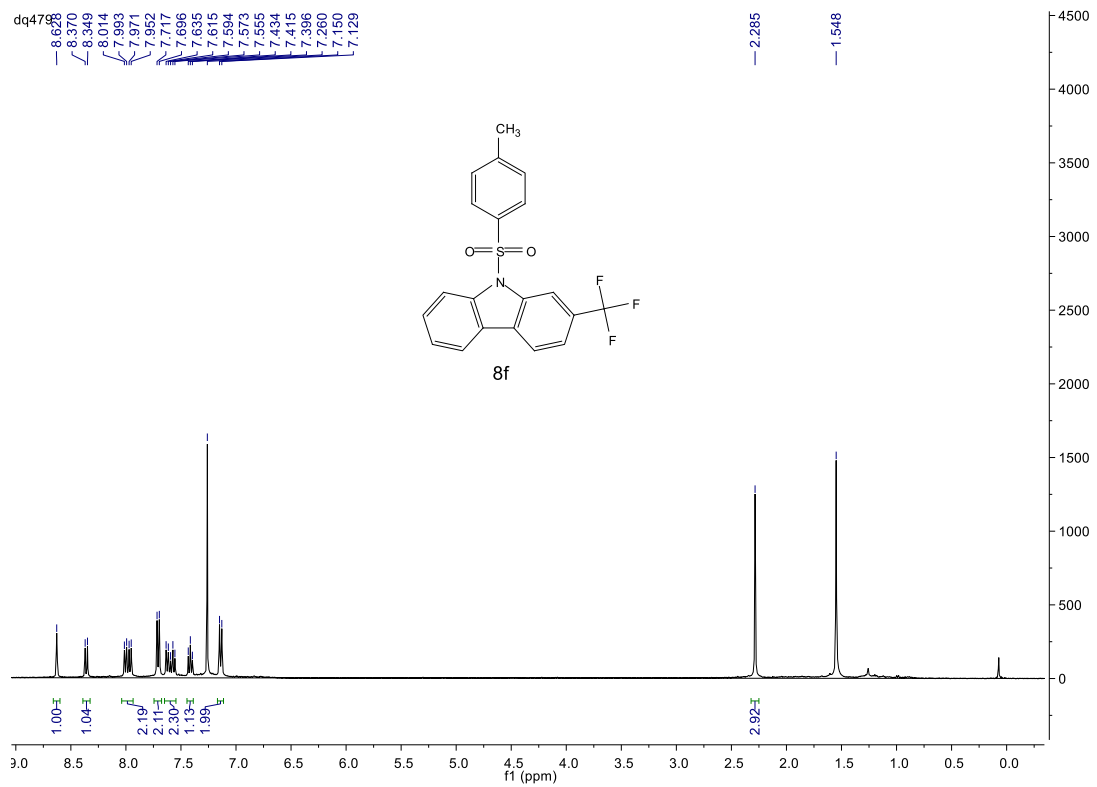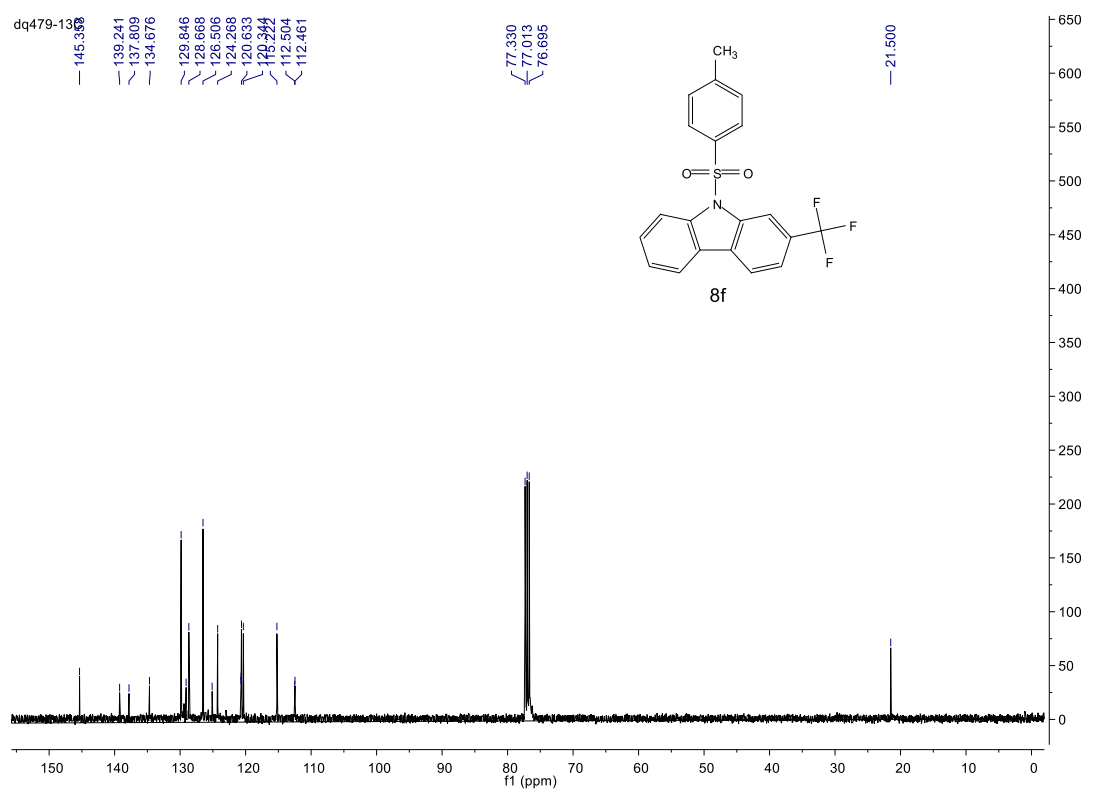

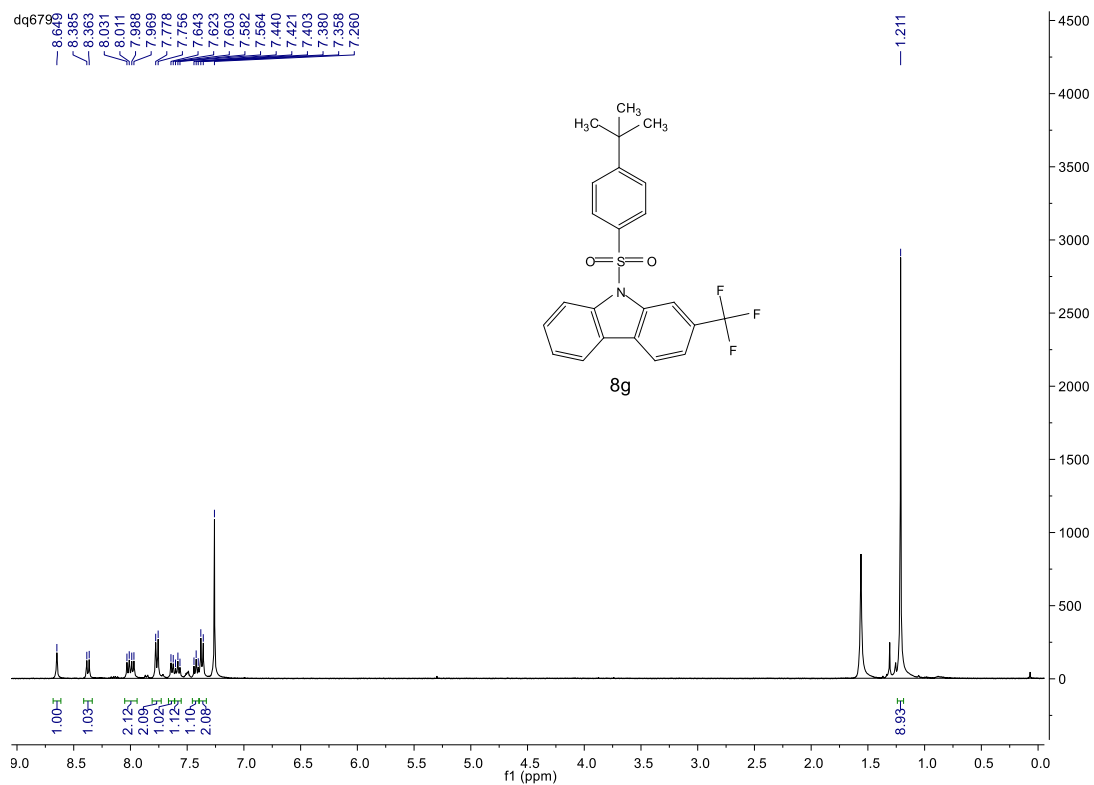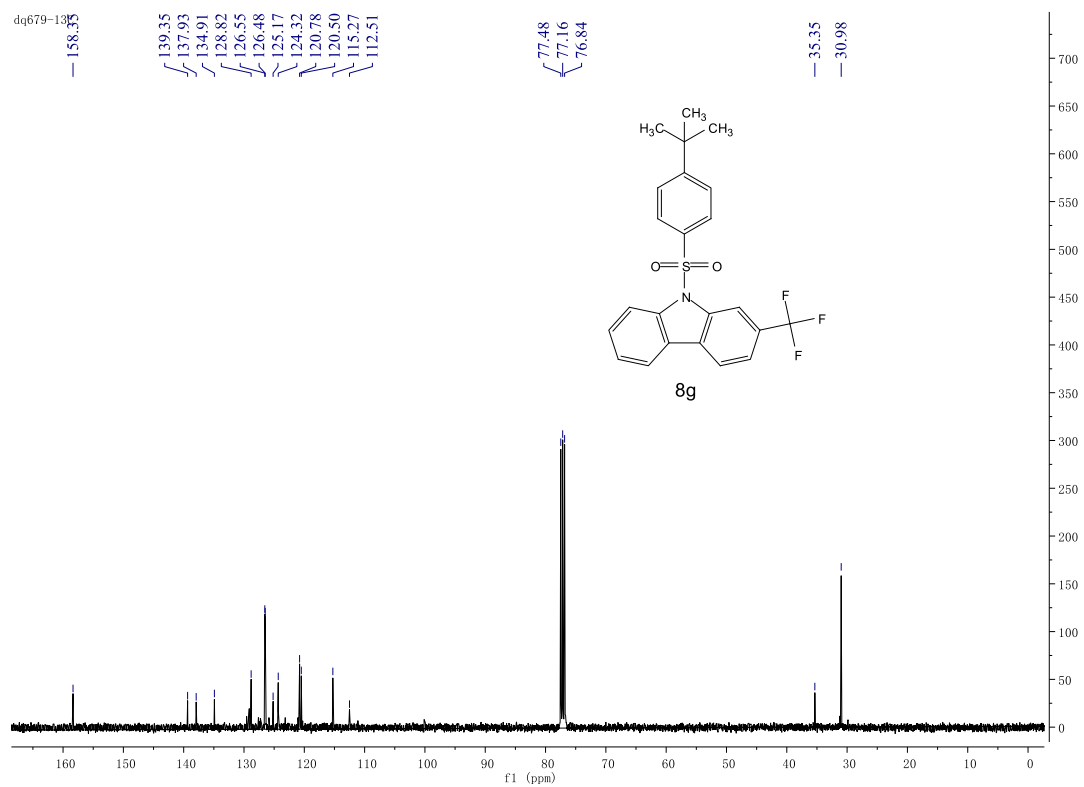

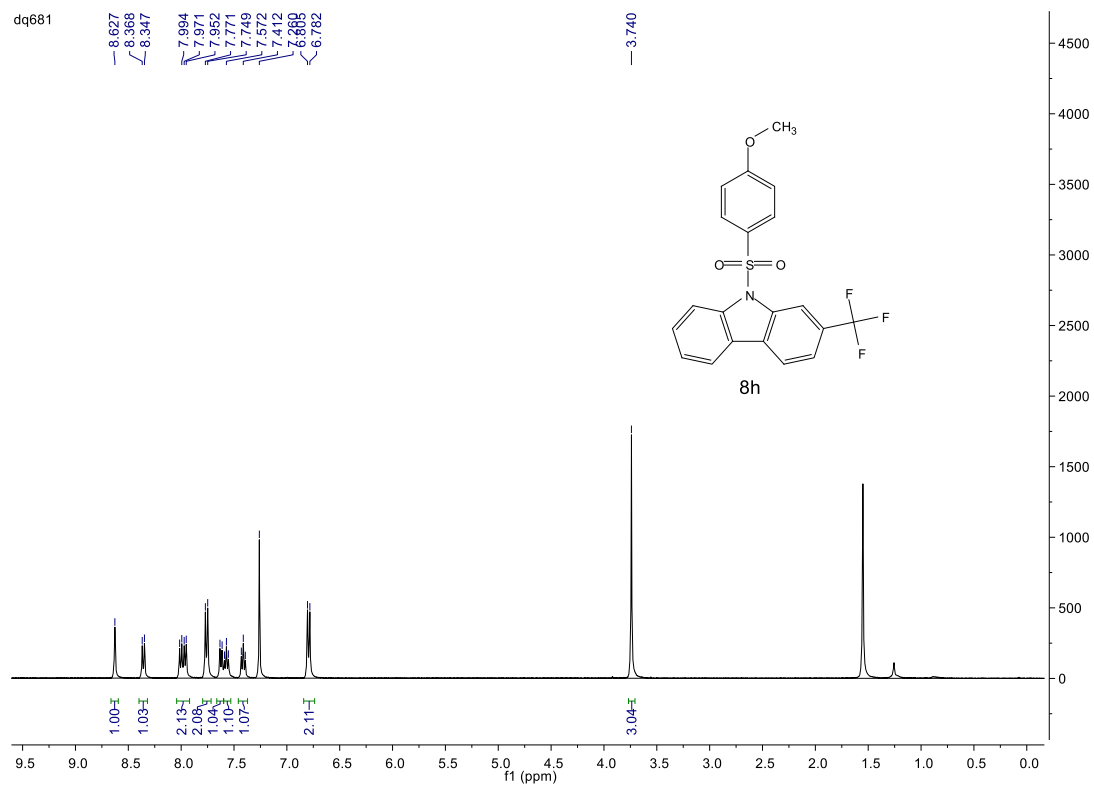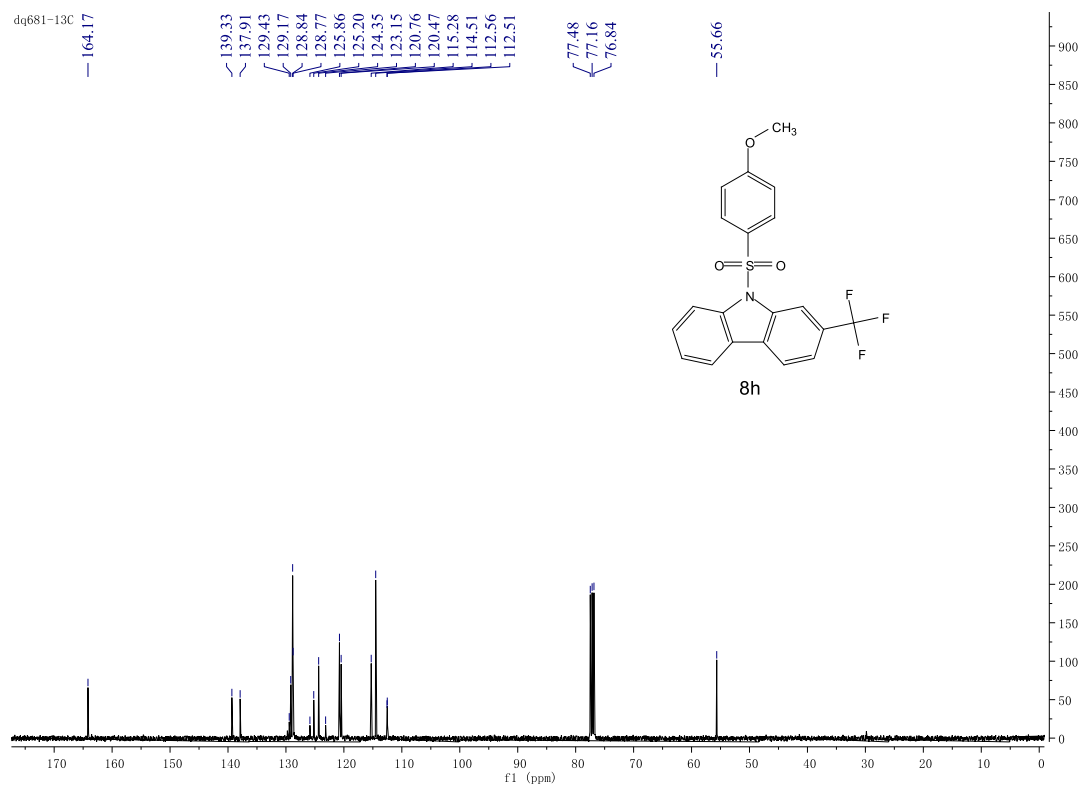



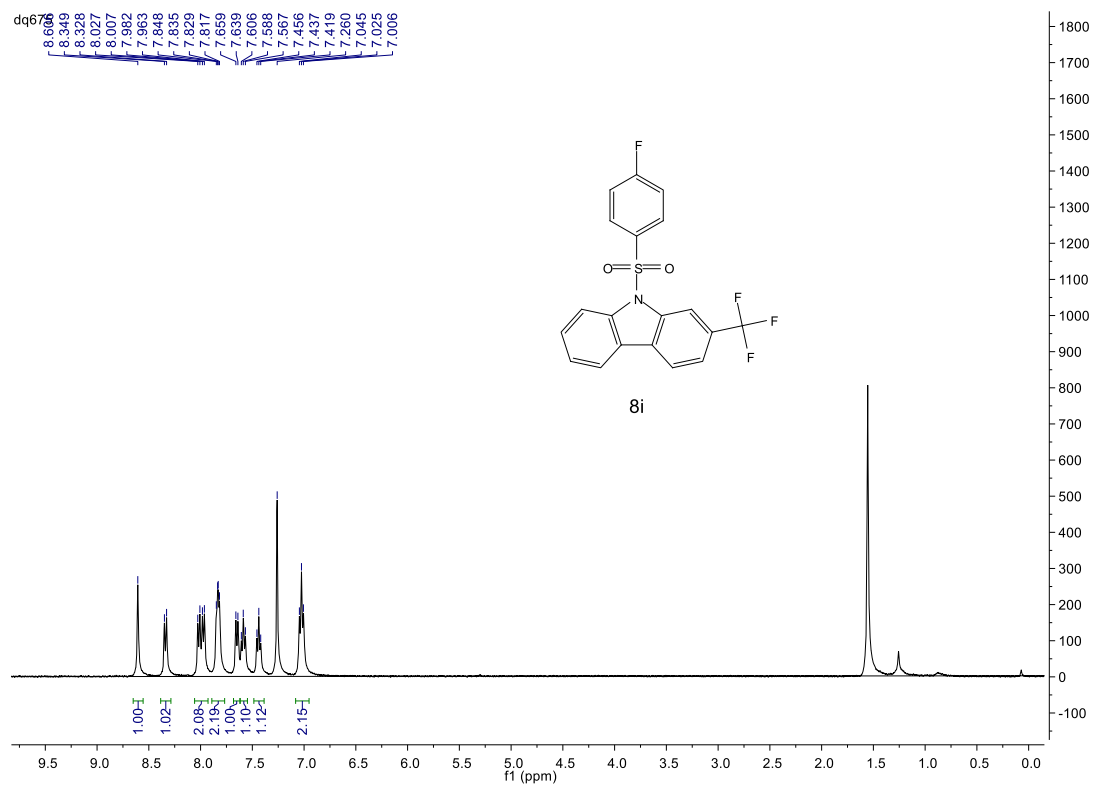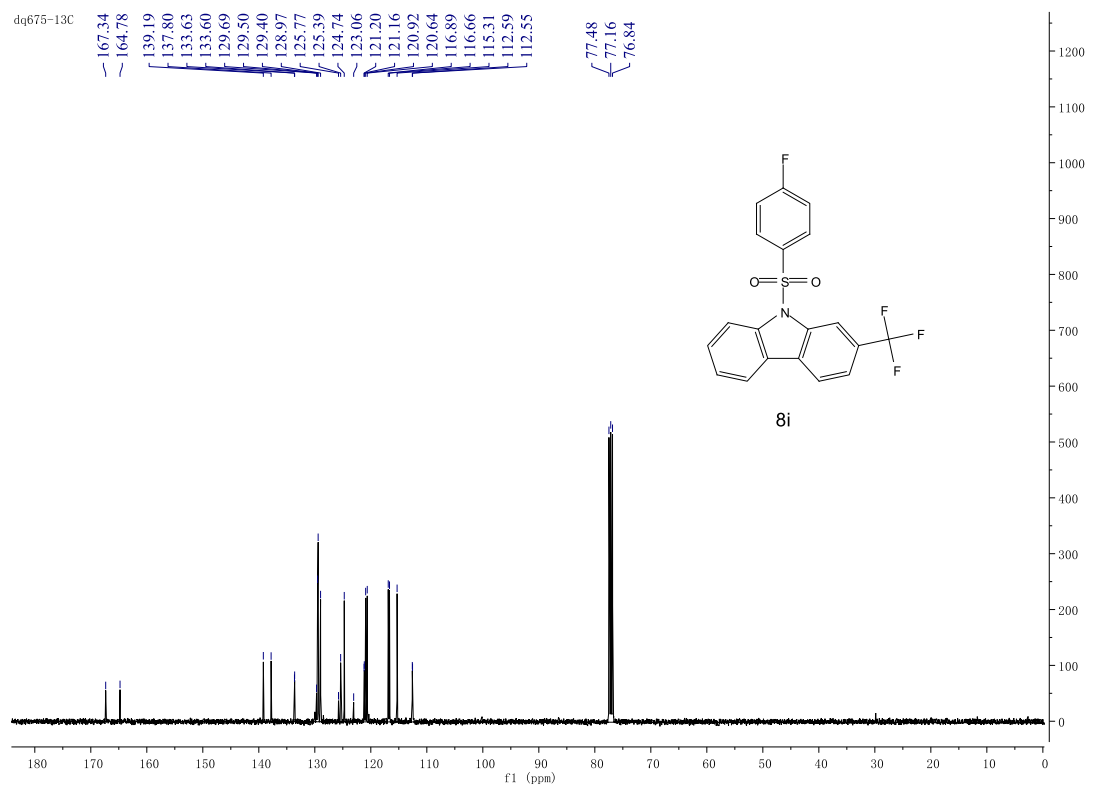

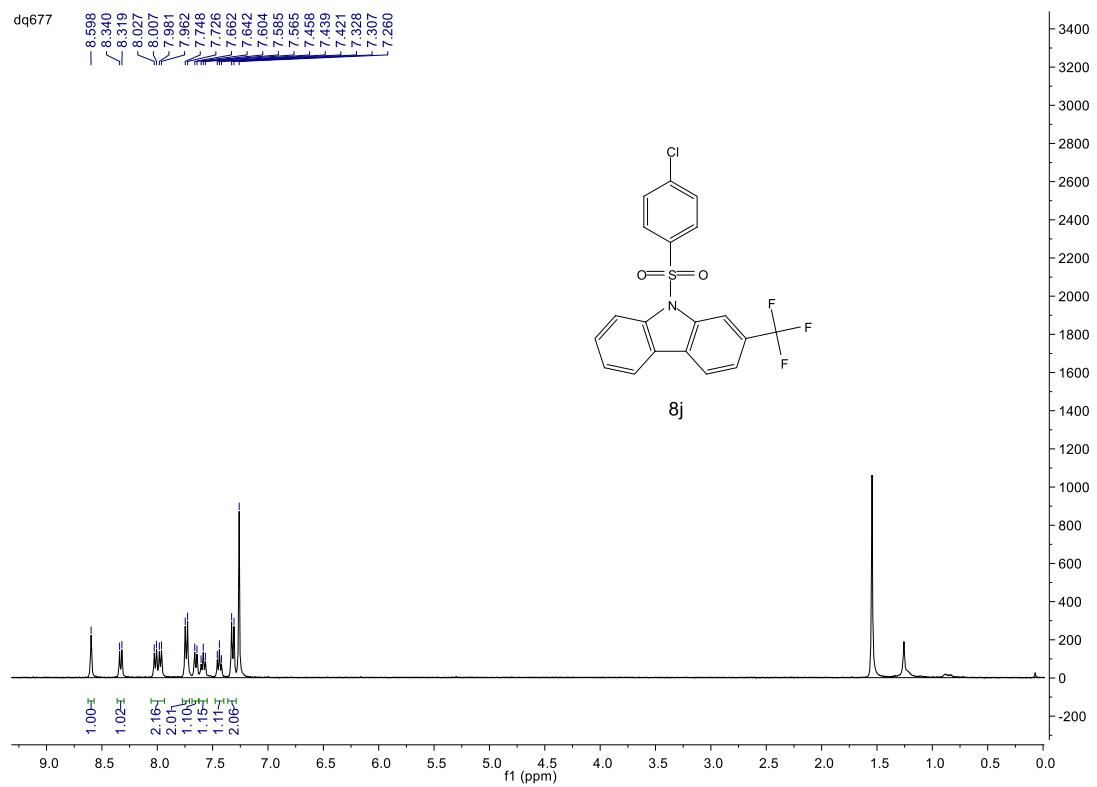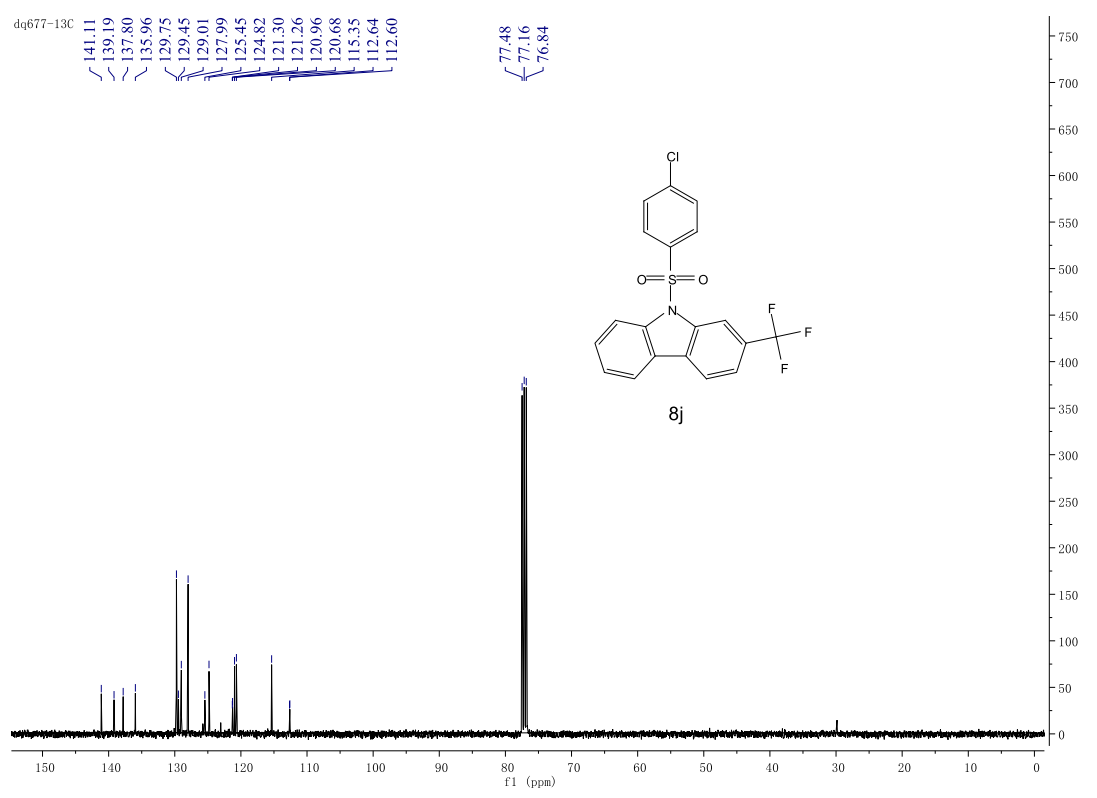

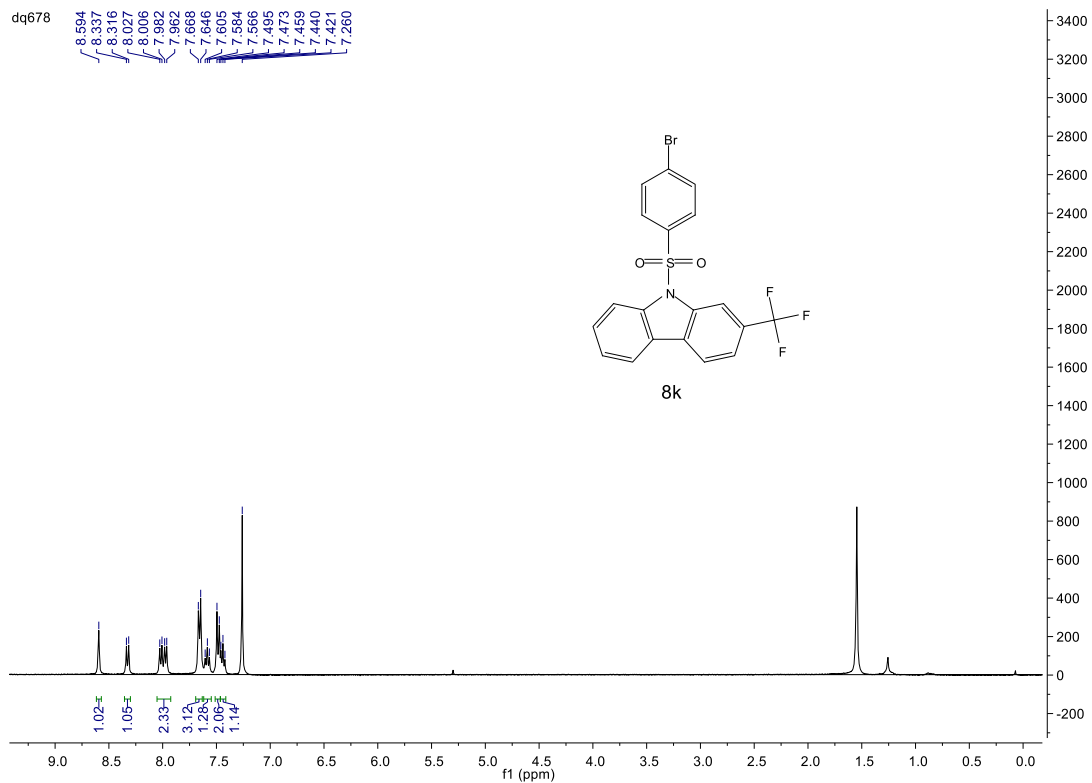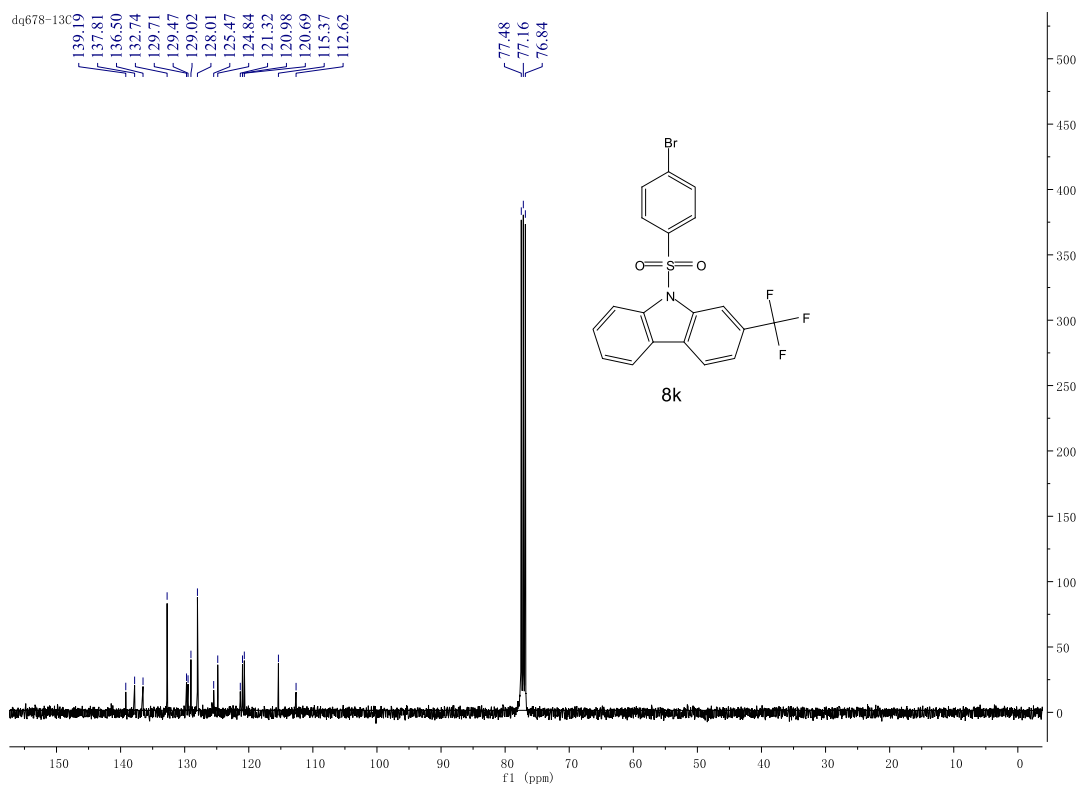

dq687

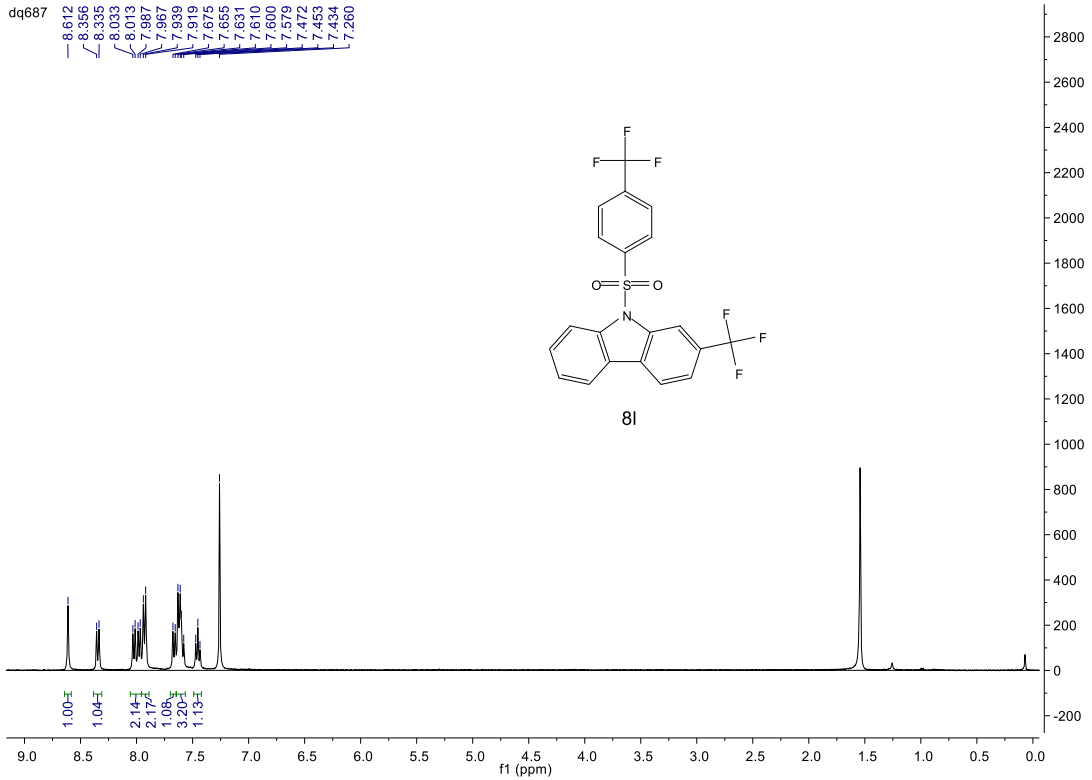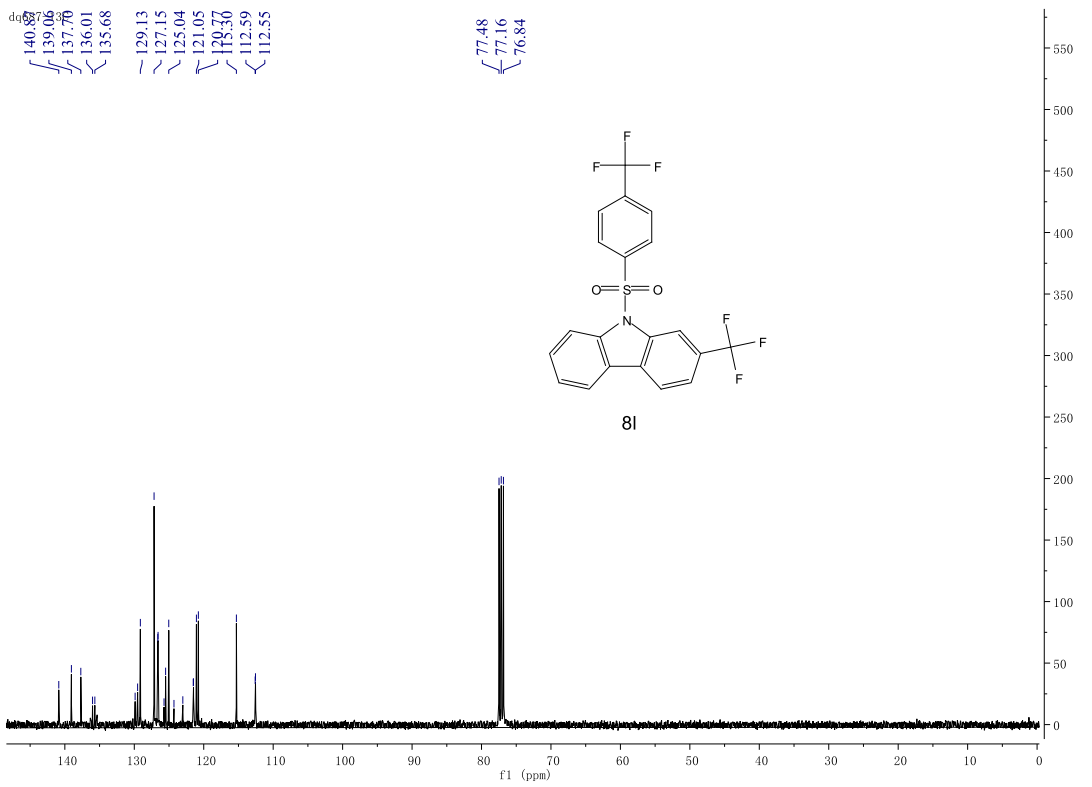

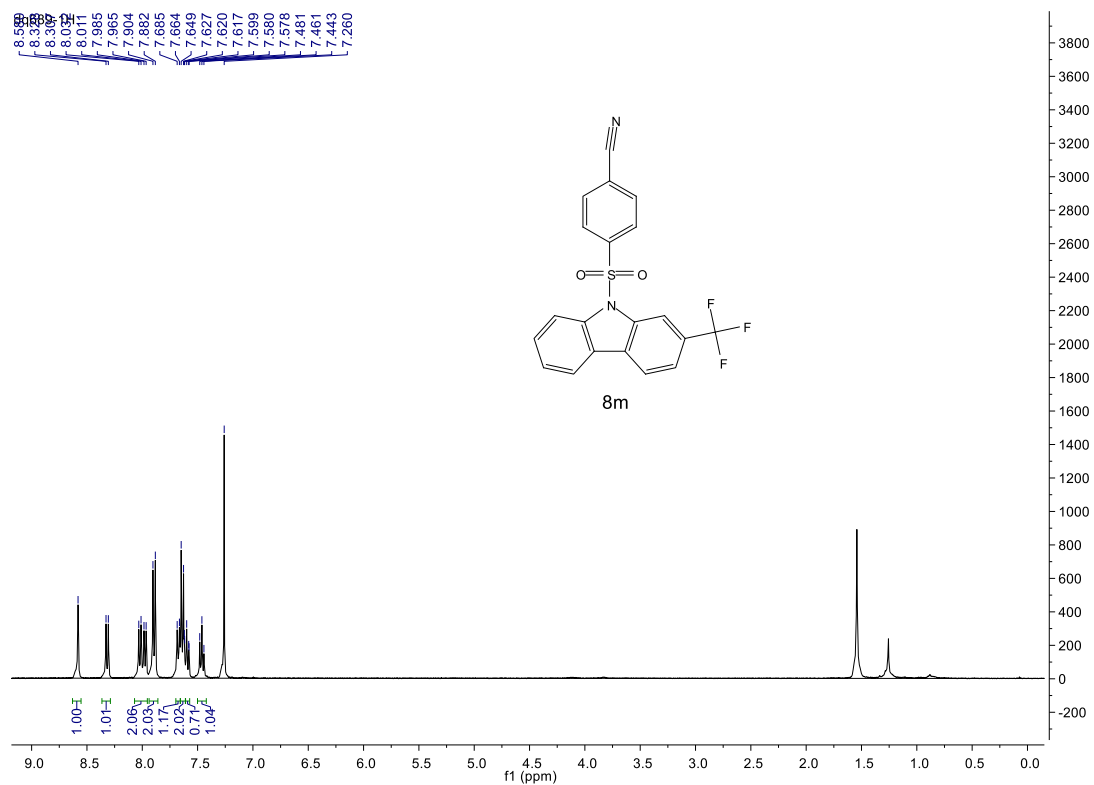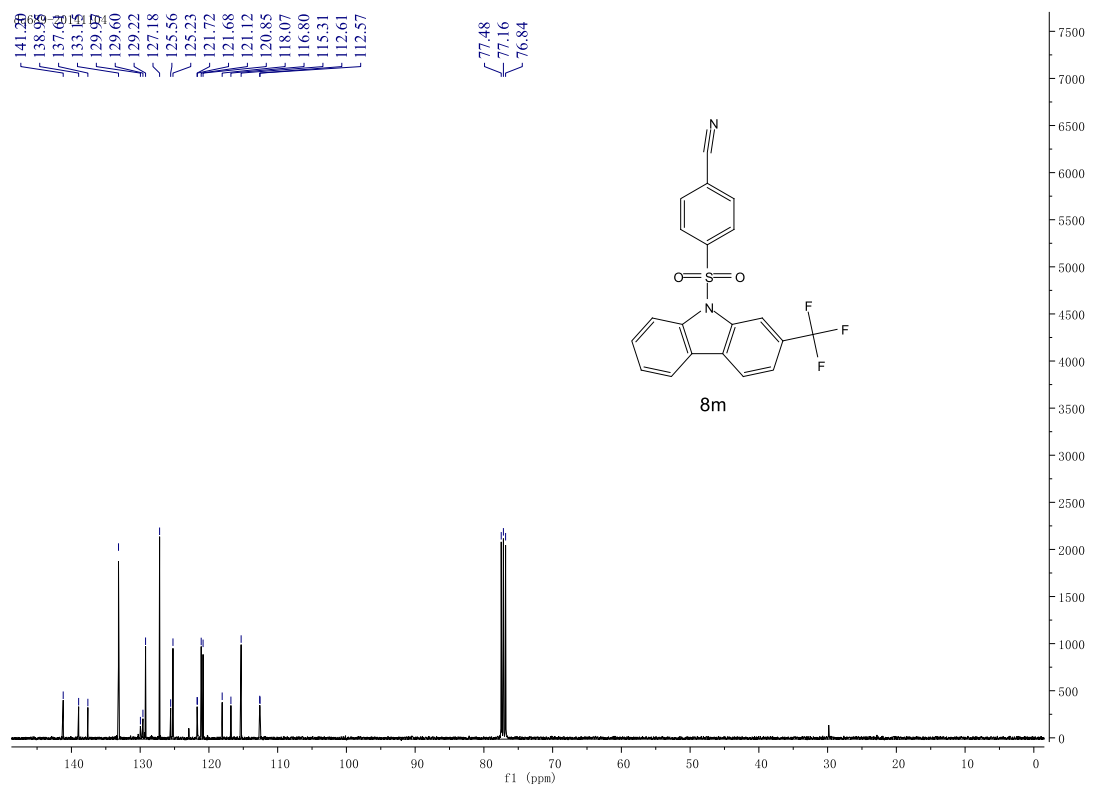

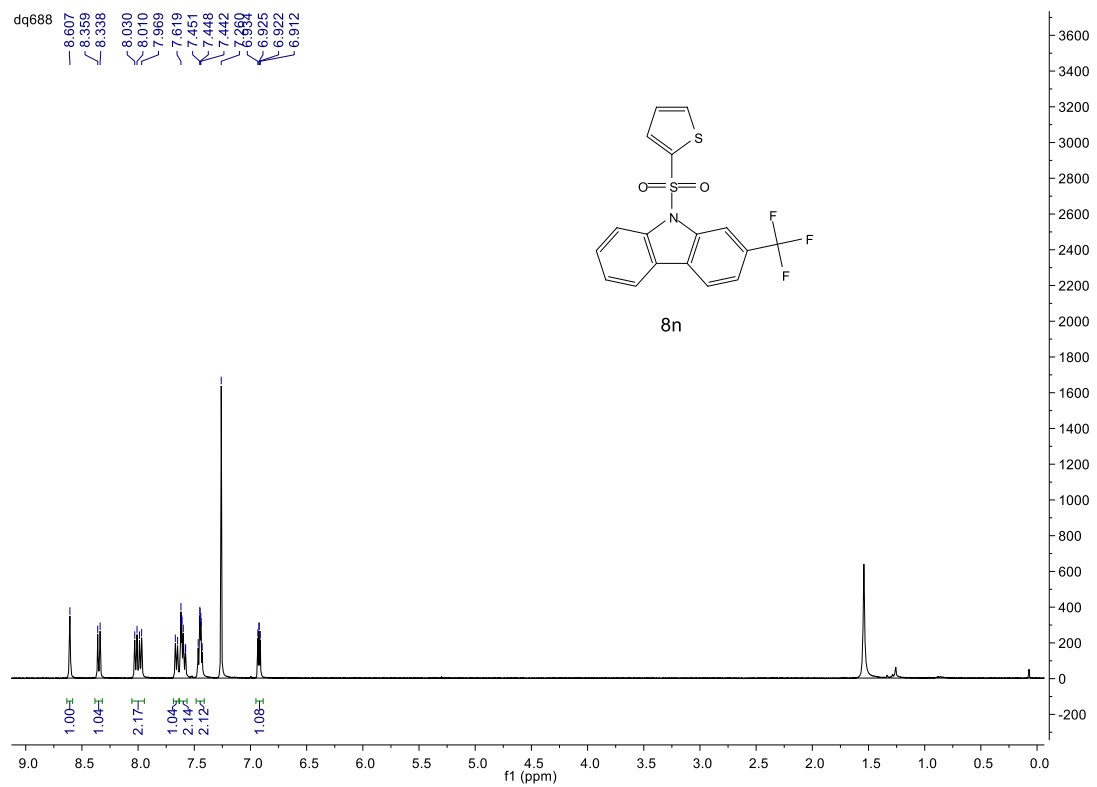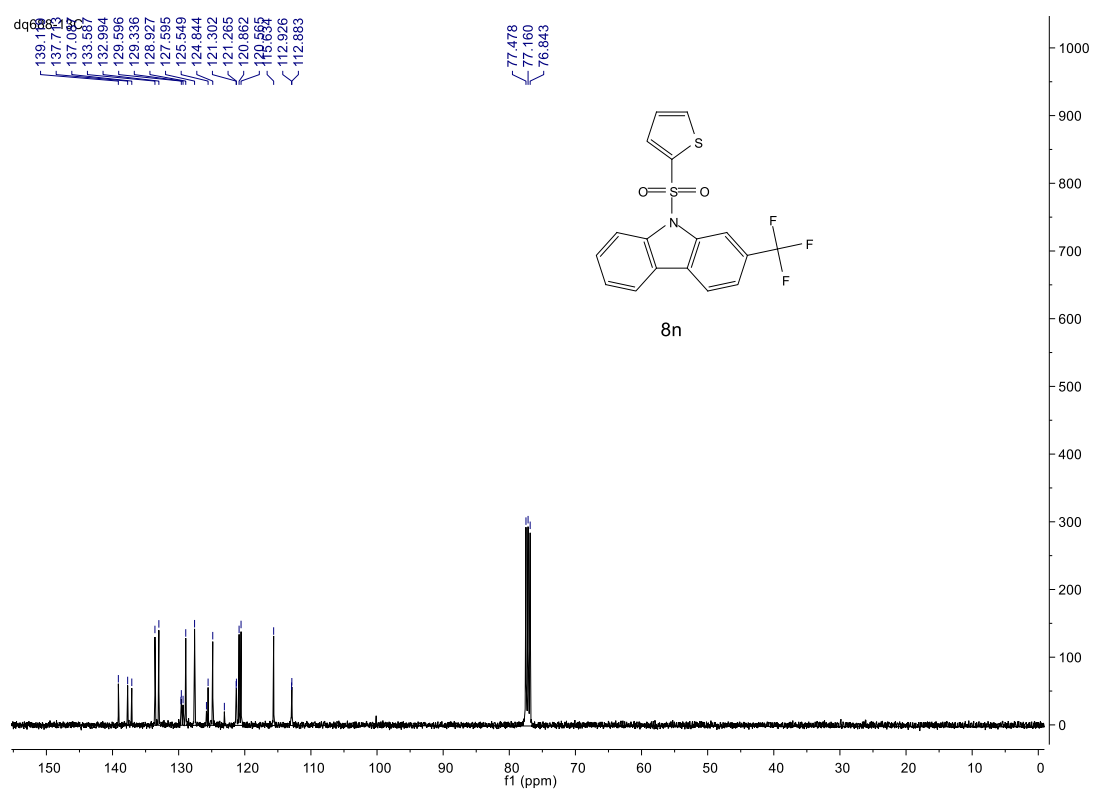

Supplement: c8ra02939c1.pdf [file c8ra02939c1.pdf]
